# Supplementary material for: A comprehensive analysis of all-cause and cause-specific excess deaths in 30 countries during 2020
Source: Springer Nature journal article supplement (doi:10.1007/s10654-023-01044-x), 2023-09-08

## Supplementary Information

**Title:** A comprehensive analysis of all-cause and cause-specific excess deaths in 30 countries during 2020

|                                                                                                                                                                                                                                                     |    |
|-----------------------------------------------------------------------------------------------------------------------------------------------------------------------------------------------------------------------------------------------------|----|
| Figure 1. Flowchart of the country selection. ....                                                                                                                                                                                                  | 2  |
| Countries abbreviations: .....                                                                                                                                                                                                                      | 3  |
| Table 1. Absolute and percent differences in the number of deaths from neoplasms registered in 2020 relative to the expected deaths, by country. ....                                                                                               | 4  |
| Table 2. Absolute and percent differences in the number of deaths from cardiovascular diseases registered in 2020 relative to the expected deaths, by country. ....                                                                                 | 5  |
| Table 3. Absolute and percent differences in the number of deaths from influenza and pneumonia registered in 2020 relative to the expected deaths, by country. ....                                                                                 | 6  |
| Table 4. Absolute and percent differences in the number of deaths from dementia and Alzheimer disease registered in 2020 relative to the expected deaths, by country. ....                                                                          | 7  |
| Table 5. Absolute and percent differences in the number of deaths from transport accidents registered in 2020 relative to the expected deaths, by country. ....                                                                                     | 8  |
| Table 6. Absolute and percent differences in the number of deaths from suicides registered in 2020 relative to the expected deaths, by country. ....                                                                                                | 9  |
| Table 7. Absolute and percent differences in the number of deaths from ill-defined causes registered in 2020 relative to the expected deaths, by country. ....                                                                                      | 10 |
| Table 8. Absolute and percent differences in the number of deaths from any cause registered in 2020 relative to the expected deaths and COVID-19 deaths, by sex and age group (<75 vs ≥75 years) in countries with populations of ≥10 million. .... | 11 |
| Table 9. Absolute and percent differences in the number of deaths from neoplasms registered in 2020 relative to the expected deaths, by age group (<75 vs ≥75 years) in countries with population of ≥10 million. ....                              | 13 |
| Table 10. Absolute and percent differences in the number of deaths from cardiovascular diseases registered in 2020 relative to the expected deaths, by age group (<75 vs ≥75 years) in countries with population ≥10 million. ....                  | 15 |
| Table 11. Absolute and percent differences in the number of deaths from ischemic heart diseases registered in 2020 relative to the expected deaths, by age group (<75 vs ≥75 years) in countries with population of ≥10 million. ....               | 17 |
| Table 12. Absolute and percent differences in the number of deaths from cerebrovascular diseases registered in 2020 relative to the expected deaths, by age group (<75 vs ≥75 years) in countries with population ≥10 million. ....                 | 19 |
| Table 13. Absolute and percent differences in the number of deaths from diabetes registered in 2020 relative to the expected deaths, by age group (<75 vs ≥75 years) in countries with population ≥10 million. ....                                 | 21 |
| Table 14. Absolute and percent differences in the number of deaths from influenza and pneumonia registered in 2020 relative to the expected deaths, by age group (<75 vs ≥75 years) in countries with population ≥10 million. ....                  | 23 |
| Table 15. Absolute and percent differences in the number of deaths from dementia and Alzheimer disease registered in 2020 relative to the expected deaths, by age group (<75 vs ≥75 years) in countries with population ≥10 million. ....           | 25 |
| Table 16. Absolute and percent differences in the number of deaths from transport accidents registered in 2020 relative to the expected deaths, by age group (<75 vs ≥75 years) in countries with population ≥10 million. ....                      | 27 |
| Table 17. Absolute and percent differences in the number of deaths from suicides registered in 2020 relative to the expected deaths, by age group (<75 vs ≥75 years) in countries with population ≥10 million. ....                                 | 29 |
| Table 18. Absolute and percent differences in the number of deaths from ill-defined causes registered in 2020 relative to the expected deaths, by age group (<75 vs ≥75 years) in countries with population ≥10 million. ....                       | 31 |
| Figure 2. Sensitivity analysis: comparison of the relative difference between observed and expected deaths (P-score) in 2019 vs 2020. ....                                                                                                          | 33 |

**Figure 1.** Flowchart of the country selection.

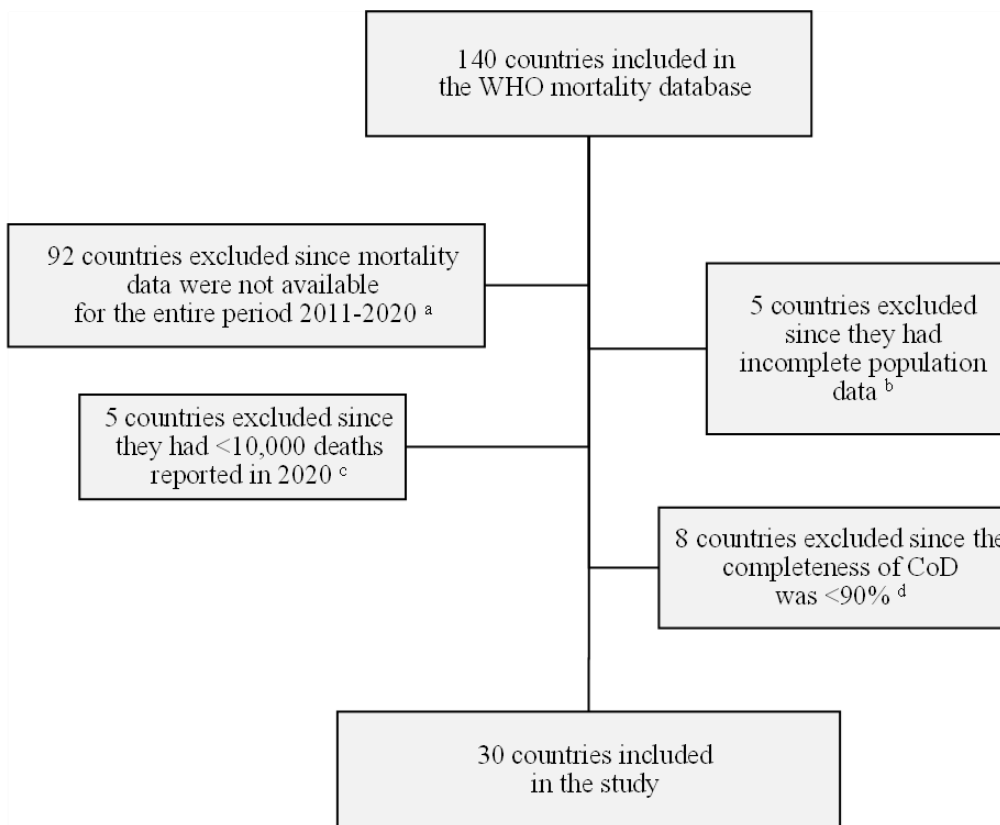

*CoD: Causes of death*

<sup>a</sup> Andorra, Anguilla, Antigua and Barbuda, Azerbaijan, Bahamas, Bahrain, Barbados, Belarus, Belgium, Belize, Bermuda, Bolivia, Bosnia and Herzegovina, British Virgin Islands, Brunei Darussalam, Canada, Cape Verde, Cayman Islands, Croatia, Dominican Republic, Egypt, El Salvador, Fiji, France, French Guiana, Greece, Guadeloupe, Guyana, Haiti, Honduras, Hong Kong SAR, Hungary, Iran (Islamic Republic of), Iraq, Ireland, Jamaica, Jordan, Kiribati, Kuwait, Kyrgyzstan, Lebanon, Libyan Arab Jamahiriya, Maldives, Malta, Martinique, Mayotte, Mongolia, Montenegro, Morocco, Netherlands Antilles, New Zealand, Norway, Occupied Palestinian Territory, Oman, Panama, Philippines, Portugal, Puerto Rico, Qatar, Réunion, Republic of Moldova, Rodrigues, Romania, Russian Federation, Saint Kitts and Nevis, Saint Pierre and Miquelon, San Marino, Saudi Arabia, Serbia and Montenegro Former, Seychelles, Singapore, Slovakia, Solomon Islands, South Africa, Sri Lanka, Suriname, Sweden, Syrian Arab Republic, Tajikistan, TFYR Macedonia, Thailand, Trinidad and Tobago, Tunisia, Turkey, Turkmenistan, Turks and Caicos Islands, Ukraine, United Arab Emirates, Uruguay, Uzbekistan, Venezuela and Virgin Islands (USA).

<sup>b</sup> Armenia, Aruba, Dominica Montserrat and Paraguay

<sup>c</sup> Grenada, Iceland, Luxembourg, Saint Lucia and Saint Vincent and Grenadines

<sup>d</sup> Colombia, Costa Rica, Cyprus, Ecuador, Kazakhstan, Malaysia, Nicaragua and Peru

## **Countries abbreviations:**

---

ARG: Argentina  
AUS: Australia  
AU: Austria  
BRA: Brazil  
BUL: Bulgaria  
CHI: Chile  
CUB: Cuba  
CZE: Czech Republic  
DEN: Denmark  
EST: Estonia  
FIN: Finland  
GEO: Georgia  
GER: Germany  
GUA: Guatemala  
ISR: Israel  
ITA: Italy  
JAP: Japan  
KOR: Republic of Korea  
LAT: Latvia  
LIT: Lithuania  
MAU: Mauritius  
MEX: Mexico  
NET: Netherlands  
POL: Poland  
SER: Serbia  
SLO: Slovenia  
SPA: Spain  
SWI: Switzerland  
UK: United Kingdom  
USA: United States of America

**Table 1.** Absolute and percent differences in the number of deaths from neoplasms registered in 2020 relative to the expected deaths, by country.

| Country              | Observed deaths  | Expected deaths  | Absolute difference<br>(95% CI)   | Percent difference<br>(95% CI) |
|----------------------|------------------|------------------|-----------------------------------|--------------------------------|
| AU                   | 21,803           | 21,337           | 466 (-279; 1211)                  | 2.2 (-1.3; 5.7)                |
| BUL                  | 18,527           | 17,743           | 784 (-95; 1663)                   | 4.4 (-0.5; 9.4)                |
| CZE                  | 28,716           | 28,324           | 392 (-644; 1428)                  | 1.4 (-2.3; 5.0)                |
| DEN                  | 16,153           | 16,277           | -124 (-734; 486)                  | -0.8 (-4.5; 3.0)               |
| EST                  | 3,801            | 4,025            | -224 (-408; -39)                  | -5.6 (-10.1; -1.0)             |
| FIN                  | 13,411           | 13,343           | 68 (-412; 548)                    | 0.5 (-3.1; 4.1)                |
| GEO                  | 8,089            | 9,054            | -965 (-1537; -392)                | -10.7 (-17.0; -4.3)            |
| GER                  | 239,552          | 242,408          | -2856 (-10199; 4487)              | -1.2 (-4.2; 1.9)               |
| ITA                  | 176,438          | 178,811          | -2373 (-7561; 2815)               | -1.3 (-4.2; 1.6)               |
| LAT                  | 6,123            | 6,086            | 37 (-225; 299)                    | 0.6 (-3.7; 4.9)                |
| LIT                  | 8,424            | 8,289            | 135 (-280; 550)                   | 1.6 (-3.4; 6.6)                |
| NET                  | 47,089           | 47,240           | -151 (-1836; 1534)                | -0.3 (-3.9; 3.2)               |
| POL                  | 108,702          | 111,118          | -2416 (-6636; 1804)               | -2.2 (-6.0; 1.6)               |
| SER                  | 21,386           | 22,015           | -629 (-1578; 320)                 | -2.9 (-7.2; 1.5)               |
| SLO                  | 6,436            | 6,541            | -105 (-399; 189)                  | -1.6 (-6.1; 2.9)               |
| SPA                  | 112,741          | 113,048          | -307 (-3916; 3302)                | -0.3 (-3.5; 2.9)               |
| SWI                  | 17,506           | 18,145           | -639 (-1241; -36)                 | -3.5 (-6.8; -0.2)              |
| UK                   | 172,301          | 174,425          | -2124 (-8634; 4386)               | -1.2 (-4.9; 2.5)               |
| MAU                  | 1,429            | 1,524            | -95 (-218; 28)                    | -6.2 (-14.3; 1.8)              |
| ARG                  | 61,062           | 65,929           | -4867 (-9108; -625)               | -7.4 (-13.8; -0.9)             |
| BRA                  | 229,286          | 242,055          | -12,769 (-27,764; 2226)           | -5.3 (-11.5; 0.9)              |
| CHI                  | 28,656           | 28,878           | -222 (-1545; 1101)                | -0.8 (-5.4; 3.8)               |
| CUB                  | 27,194           | 27,046           | 148 (-909; 1205)                  | 0.5 (-3.4; 4.5)                |
| GUA                  | 8,944            | 8,570            | 374 (-513; 1261)                  | 4.4 (-6.0; 14.7)               |
| MEX                  | 95,461           | 96,450           | -989 (-7620; 5642)                | -1 (-7.9; 5.8)                 |
| USA                  | 618,620          | 621,831          | -3211 (-29,899; 23,477)           | -0.5 (-4.8; 3.8)               |
| ISR                  | 12,182           | 12,321           | -139 (-857; 579)                  | -1.1 (-7.0; 4.7)               |
| JAP                  | 391,521          | 388,176          | 3345 (-7488; 14178)               | 0.9 (-1.9; 3.7)                |
| KOR                  | 83,771           | 83,538           | 233 (-3566; 4032)                 | 0.3 (-4.3; 4.8)                |
| AUS                  | 48,788           | 49,980           | -1192 (-3249; 865)                | -2.4 (-6.5; 1.7)               |
| <i>All countries</i> | <i>2,634,112</i> | <i>2,664,469</i> | <i>-30,357 (-125,583; 64,869)</i> | <i>-1.1 (-4.7; 2.4)</i>        |

**Table 2.** Absolute and percent differences in the number of deaths from cardiovascular diseases registered in 2020 relative to the expected deaths, by country.

| Country              | Observed deaths  | Expected deaths  | Absolute difference<br>(95% CI)  | Percent difference<br>(95% CI) |
|----------------------|------------------|------------------|----------------------------------|--------------------------------|
| AU                   | 32,544           | 32,750           | -206 (-1108; 696)                | -0.6 (-3.4; 2.1)               |
| BUL                  | 74,648           | 69,257           | 5391 (3352; 7429)                | 7.8 (4.8; 10.7)                |
| CZE                  | 50,344           | 46,158           | 4186 (2920; 5451)                | 9.1 (6.3; 11.8)                |
| DEN                  | 11,415           | 11,860           | -445 (-854; -35)                 | -3.8 (-7.2; -0.3)              |
| EST                  | 7,701            | 7,596            | 105 (-150; 360)                  | 1.4 (-2.0; 4.7)                |
| FIN                  | 18,566           | 18,277           | 289 (-267; 845)                  | 1.6 (-1.5; 4.6)                |
| GEO                  | 21,895           | 23,357           | -1462 (-3020; 96)                | -6.3 (-12.9; 0.4)              |
| GER                  | 338,001          | 342,533          | -4532 (-13,001; 3937)            | -1.3 (-3.8; 1.1)               |
| ITA                  | 225,244          | 220,807          | 4437 (-503; 9377)                | 2 (-0.2; 4.2)                  |
| LAT                  | 15,408           | 15,183           | 225 (-429; 879)                  | 1.5 (-2.8; 5.8)                |
| LIT                  | 22,940           | 21,284           | 1656 (824; 2487)                 | 7.8 (3.9; 11.7)                |
| NET                  | 35,281           | 36,370           | -1089 (-2162; -15)               | -3 (-5.9; 0.0)                 |
| POL                  | 174,399          | 160,489          | 13,910 (8437; 19,382)            | 8.7 (5.3; 12.1)                |
| SER                  | 51,040           | 49,395           | 1645 (310; 2979)                 | 3.3 (0.6; 6.0)                 |
| SLO                  | 7,714            | 8,010            | -296 (-566; -25)                 | -3.7 (-7.1; -0.3)              |
| SPA                  | 119,853          | 117,166          | 2687 (-320; 5694)                | 2.3 (-0.3; 4.9)                |
| SWI                  | 20,511           | 20,279           | 232 (-270; 734)                  | 1.1 (-1.3; 3.6)                |
| UK                   | 151,641          | 147,757          | 3884 (-1299; 9067)               | 2.6 (-0.9; 6.1)                |
| MAU                  | 3,302            | 3,811            | -509 (-819; -198)                | -13.4 (-21.5; -5.2)            |
| ARG                  | 95,664           | 96,152           | -488 (-4726; 3750)               | -0.5 (-4.9; 3.9)               |
| BRA                  | 357,550          | 368,596          | -11,046 (-33,903; 11,811)        | -3 (-9.2; 3.2)                 |
| CHI                  | 29,018           | 28,523           | 495 (-783; 1773)                 | 1.7 (-2.7; 6.2)                |
| CUB                  | 44,376           | 41,639           | 2737 (1233; 4240)                | 6.6 (3.0; 10.2)                |
| GUA                  | 16,452           | 13,812           | 2640 (1535; 3744)                | 19.1 (11.1; 27.1)              |
| MEX                  | 254,791          | 198,449          | 56,342 (44,549; 68,134)          | 28.4 (22.4; 34.3)              |
| USA                  | 912,653          | 881,524          | 31,129 (-9008; 71,266)           | 3.5 (-1.0; 8.1)                |
| ISR                  | 10,339           | 10,058           | 281 (-92; 654)                   | 2.8 (-0.9; 6.5)                |
| JAP                  | 344,780          | 342,439          | 2341 (-6587; 11,269)             | 0.7 (-1.9; 3.3)                |
| KOR                  | 60,042           | 62,317           | -2275 (-4833; 283)               | -3.7 (-7.8; 0.5)               |
| AUS                  | 40,288           | 42,891           | -2603 (-4249; -956)              | -6.1 (-9.9; -2.2)              |
| <i>All countries</i> | <i>3,548,400</i> | <i>3,437,607</i> | <i>110,793 (40,253; 181,332)</i> | <i>3.2 (1.2; 5.3)</i>          |

**Table 3.** Absolute and percent differences in the number of deaths from influenza and pneumonia registered in 2020 relative to the expected deaths, by country.

| Country              | Observed deaths | Expected deaths | Absolute difference<br>(95% CI)   | Percent difference<br>(95% CI) |
|----------------------|-----------------|-----------------|-----------------------------------|--------------------------------|
| AU                   | 1,201           | 1,690           | -489 (-636; -341)                 | -28.9 (-37.6; -20.2)           |
| BUL                  | 3,025           | 1,374           | 1651 (1488; 1813)                 | 120.2 (108.3; 132.0)           |
| CZE                  | 3,931           | 3,909           | 22 (-167; 211)                    | 0.6 (-4.3; 5.4)                |
| DEN                  | 1,543           | 1,926           | -383 (-497; -268)                 | -19.9 (-25.8; -13.9)           |
| EST                  | 271             | 392             | -121 (-174; -67)                  | -30.9 (-44.4; -17.1)           |
| FIN                  | 117             | 349             | -232 (-284; -179)                 | -66.5 (-81.4; -51.3)           |
| GEO                  | 2,726           | 2,463           | 263 (-35; 561)                    | 10.7 (-1.4; 22.8)              |
| GER                  | 17,206          | 21,836          | -4630 (-5411; -3848)              | -21.2 (-24.8; -17.6)           |
| ITA                  | 15,837          | 16,201          | -364 (-912; 184)                  | -2.2 (-5.6; 1.1)               |
| LAT                  | 378             | 487             | -109 (-176; -41)                  | -22.4 (-36.1; -8.4)            |
| LIT                  | 612             | 697             | -85 (-172; 2)                     | -12.2 (-24.7; 0.3)             |
| NET                  | 3,021           | 3,593           | -572 (-839; -304)                 | -15.9 (-23.4; -8.5)            |
| POL                  | 19,913          | 19,545          | 368 (-437; 1173)                  | 1.9 (-2.2; 6.0)                |
| SER                  | 3,034           | 1,933           | 1101 (961; 1240)                  | 57 (49.7; 64.1)                |
| SLO                  | 301             | 472             | -171 (-220; -121)                 | -36.2 (-46.6; -25.6)           |
| SPA                  | 9,662           | 11,948          | -2286 (-2756; -1815)              | -19.1 (-23.1; -15.2)           |
| SWI                  | 1,217           | 1,741           | -524 (-634; -413)                 | -30.1 (-36.4; -23.7)           |
| UK                   | 21,879          | 31,169          | -9290 (-10,440; -8139)            | -29.8 (-33.5; -26.1)           |
| MAU                  | 190             | 306             | -116 (-160; -71)                  | -37.9 (-52.3; -23.2)           |
| ARG                  | 26,968          | 37,596          | -10,628 (-12,557; -8698)          | -28.3 (-33.4; -23.1)           |
| BRA                  | 68,194          | 90,616          | -22,422 (-30,094; -14,749)        | -24.7 (-33.2; -16.3)           |
| CHI                  | 3,209           | 4,708           | -1499 (-1893; -1104)              | -31.8 (-40.2; -23.4)           |
| CUB                  | 6,646           | 9,082           | -2436 (-2934; -1937)              | -26.8 (-32.3; -21.3)           |
| GUA                  | 4,068           | 6,643           | -2575 (-5109; -40)                | -38.8 (-76.9; -0.6)            |
| MEX                  | 57,277          | 31,208          | 26,069 (21330; 30,807)            | 83.5 (68.3; 98.7)              |
| USA                  | 53,542          | 54,325          | -783 (-3464; 1898)                | -1.4 (-6.4; 3.5)               |
| ISR                  | 1,485           | 1,628           | -143 (-253; -32)                  | -8.8 (-15.5; -2.0)             |
| JAP                  | 79,401          | 94,668          | -15,267 (-17,695; -12,838)        | -16.1 (-18.7; -13.6)           |
| KOR                  | 22,509          | 28,681          | -6172 (-6961; -5382)              | -21.5 (-24.3; -18.8)           |
| AUS                  | 2,287           | 4,249           | -1962 (-2211; -1712)              | -46.2 (-52.0; -40.3)           |
| <i>All countries</i> | <i>431,650</i>  | <i>485,287</i>  | <i>-53,637 (-88,681; -18,592)</i> | <i>-11.1 (-18.3; -3.8)</i>     |

**Table 4.** Absolute and percent differences in the number of deaths from dementia and Alzheimer disease registered in 2020 relative to the expected deaths, by country.

| Country              | Observed deaths | Expected deaths | Absolute difference<br>(95% CI) | Percent difference<br>(95% CI) |
|----------------------|-----------------|-----------------|---------------------------------|--------------------------------|
| AU                   | 3,665           | 4,829           | -1164 (-1442; -885)             | -24.1 (-29.9; -18.3)           |
| BUL                  | 146             | 121             | 25 (0; 50)                      | 20.7 (0.0; 41.3)               |
| CZE                  | 4,353           | 4,281           | 72 (-237; 381)                  | 1.7 (-5.5; 8.9)                |
| DEN                  | 4,205           | 4,903           | -698 (-968; -427)               | -14.2 (-19.7; -8.7)            |
| EST                  | 227             | 197             | 30 (-8; 68)                     | 15.2 (-4.1; 34.5)              |
| FIN                  | 10,667          | 11,099          | -432 (-886; 22)                 | -3.9 (-8.0; 0.2)               |
| GEO                  | 139             | 138             | 1 (-37; 39)                     | 0.7 (-26.8; 28.3)              |
| GER                  | 60,693          | 70,557          | -9864 (-12,445; -7282)          | -14 (-17.6; -10.3)             |
| ITA                  | 37,395          | 38,020          | -625 (-2011; 761)               | -1.6 (-5.3; 2.0)               |
| LAT                  | 577             | 670             | -93 (-171; -14)                 | -13.9 (-25.5; -2.1)            |
| LIT                  | 593             | 587             | 6 (-61; 73)                     | 1 (-10.4; 12.4)                |
| NET                  | 14,279          | 17,531          | -3252 (-4064; -2439)            | -18.5 (-23.2; -13.9)           |
| POL                  | 3,529           | 3,037           | 492 (229; 754)                  | 16.2 (7.5; 24.8)               |
| SER                  | 2,173           | 2,477           | -304 (-487; -120)               | -12.3 (-19.7; -4.8)            |
| SLO                  | 459             | 395             | 64 (5; 122)                     | 16.2 (1.3; 30.9)               |
| SPA                  | 36,393          | 38,948          | -2555 (-3968; -1141)            | -6.6 (-10.2; -2.9)             |
| SWI                  | 6,524           | 6,789           | -265 (-550; 20)                 | -3.9 (-8.1; 0.3)               |
| UK                   | 78,386          | 89,781          | -11,395 (-15,196; -7593)        | -12.7 (-16.9; -8.5)            |
| MAU                  | 9 <sup>a</sup>  | .               | .                               | .                              |
| ARG                  | 3,091           | 3,478           | -387 (-628; -145)               | -11.1 (-18.1; -4.2)            |
| BRA                  | 26,737          | 27,801          | -1064 (-2959; 831)              | -3.8 (-10.6; 3.0)              |
| CHI                  | 4,353           | 3,738           | 615 (347; 882)                  | 16.5 (9.3; 23.6)               |
| CUB                  | 5,436           | 5,924           | -488 (-872; -103)               | -8.2 (-14.7; -1.7)             |
| GUA                  | 207             | 233             | -26 (-81; 29)                   | -11.2 (-34.8; 12.4)            |
| MEX                  | 3,693           | 3,592           | 101 (-305; 507)                 | 2.8 (-8.5; 14.1)               |
| USA                  | 259,513         | 244,482         | 15,031 (2876; 27,185)           | 6.1 (1.2; 11.1)                |
| ISR                  | 2,777           | 3,084           | -307 (-505; -108)               | -10 (-16.4; -3.5)              |
| JAP                  | 41,678          | 50,389          | -8711 (-10,615; -6806)          | -17.3 (-21.1; -13.5)           |
| KOR                  | 10,640          | 10,850          | -210 (-871; 451)                | -1.9 (-8.0; 4.2)               |
| AUS                  | 14,575          | 15,863          | -1288 (-2003; -572)             | -8.1 (-12.6; -3.6)             |
| <i>All countries</i> | 637,112         | 663,616         | -26,504 (-60,858; 7850)         | -4.0 (-9.2; 1.2)               |

<sup>a</sup> Expected deaths were not estimated when observed deaths were <10

**Table 5.** Absolute and percent differences in the number of deaths from transport accidents registered in 2020 relative to the expected deaths, by country.

| Country              | Observed deaths | Expected deaths | Absolute difference<br>(95% CI) | Percent difference<br>(95% CI) |
|----------------------|-----------------|-----------------|---------------------------------|--------------------------------|
| AU                   | 369             | 386             | -17 (-84; 50)                   | -4.4 (-21.8; 13.0)             |
| BUL                  | 439             | 578             | -139 (-229; -48)                | -24 (-39.6; -8.3)              |
| CZE                  | 666             | 684             | -18 (-133; 97)                  | -2.6 (-19.4; 14.2)             |
| DEN                  | 200             | 214             | -14 (-53; 25)                   | -6.5 (-24.8; 11.7)             |
| EST                  | 70              | 57              | 13 (-2; 28)                     | 22.8 (-3.5; 49.1)              |
| FIN                  | 269             | 275             | -6 (-54; 42)                    | -2.2 (-19.6; 15.3)             |
| GEO                  | 554             | 912             | -358 (-567; -148)               | -39.3 (-62.2; -16.2)           |
| GER                  | 3,118           | 3,314           | -196 (-682; 290)                | -5.9 (-20.6; 8.8)              |
| ITA                  | 2,618           | 3,321           | -703 (-1181; -224)              | -21.2 (-35.6; -6.7)            |
| LAT                  | 155             | 166             | -11 (-42; 20)                   | -6.6 (-25.3; 12.0)             |
| LIT                  | 217             | 202             | 15 (-19; 49)                    | 7.4 (-9.4; 24.3)               |
| NET                  | 669             | 695             | -26 (-125; 73)                  | -3.7 (-18.0; 10.5)             |
| POL                  | 3,643           | 3,324           | 319 (-174; 812)                 | 9.6 (-5.2; 24.4)               |
| SER                  | 495             | 496             | -1 (-77; 75)                    | -0.2 (-15.5; 15.1)             |
| SLO                  | 122             | 119             | 3 (-22; 28)                     | 2.5 (-18.5; 23.5)              |
| SPA                  | 1,726           | 2,057           | -331 (-611; -50)                | -16.1 (-29.7; -2.4)            |
| SWI                  | 244             | 249             | -5 (-47; 37)                    | -2 (-18.9; 14.9)               |
| UK                   | 1,423           | 1,821           | -398 (-696; -99)                | -21.9 (-38.2; -5.4)            |
| MAU                  | 150             | 168             | -18 (-56; 20)                   | -10.7 (-33.3; 11.9)            |
| ARG                  | 2,349           | 3,840           | -1491 (-2222; -759)             | -38.8 (-57.9; -19.8)           |
| BRA                  | 33,657          | 31,805          | 1852 (-3782; 7486)              | 5.8 (-11.9; 23.5)              |
| CHI                  | 1,749           | 1,873           | -124 (-396; 148)                | -6.6 (-21.1; 7.9)              |
| CUB                  | 676             | 984             | -308 (-451; -164)               | -31.3 (-45.8; -16.7)           |
| GUA                  | 1,345           | 1,908           | -563 (-972; -153)               | -29.5 (-50.9; -8.0)            |
| MEX                  | 13,561          | 14,986          | -1425 (-4020; 1170)             | -9.5 (-26.8; 7.8)              |
| USA                  | 45,159          | 43,726          | 1433 (-5011; 7877)              | 3.3 (-11.5; 18.0)              |
| ISR                  | 347             | 371             | -24 (-95; 47)                   | -6.5 (-25.6; 12.7)             |
| JAP                  | 3,821           | 4,264           | -443 (-831; -54)                | -10.4 (-19.5; -1.3)            |
| KOR                  | 3,987           | 4,233           | -246 (-617; 125)                | -5.8 (-14.6; 3.0)              |
| AUS                  | 1,355           | 1,412           | -57 (-267; 153)                 | -4 (-18.9; 10.8)               |
| <i>All countries</i> | <i>125,153</i>  | <i>128,486</i>  | <i>-3333 (-7568; 902)</i>       | <i>-2.6 (-5.9; 0.7)</i>        |



**Table 6.** Absolute and percent differences in the number of deaths from suicides registered in 2020 relative to the expected deaths, by country.

| Country              | Observed deaths | Expected deaths | Absolute difference<br>(95% CI) | Percent difference<br>(95% CI) |
|----------------------|-----------------|-----------------|---------------------------------|--------------------------------|
| AU                   | 1,072           | 1,142           | -70 (-214; 74)                  | -6.1 (-18.7; 6.5)              |
| BUL                  | 588             | 582             | 6 (-74; 86)                     | 1 (-12.7; 14.8)                |
| CZE                  | 1,224           | 1,207           | 17 (-167; 201)                  | 1.4 (-13.8; 16.7)              |
| DEN                  | 579             | 575             | 4 (-82; 90)                     | 0.7 (-14.3; 15.7)              |
| EST                  | 210             | 192             | 18 (-20; 56)                    | 9.4 (-10.4; 29.2)              |
| FIN                  | 717             | 734             | -17 (-152; 118)                 | -2.3 (-20.7; 16.1)             |
| GEO                  | 202             | 296             | -94 (-155; -32)                 | -31.8 (-52.4; -10.8)           |
| GER                  | 9,221           | 9,138           | 83 (-949; 1115)                 | 0.9 (-10.4; 12.2)              |
| ITA                  | 3,618           | 3,617           | 1 (-456; 458)                   | 0 (-12.6; 12.7)                |
| LAT                  | 298             | 286             | 12 (-43; 67)                    | 4.2 (-15.0; 23.4)              |
| LIT                  | 608             | 652             | -44 (-156; 68)                  | -6.7 (-23.9; 10.4)             |
| NET                  | 1,824           | 1,913           | -89 (-370; 192)                 | -4.7 (-19.3; 10.0)             |
| POL                  | 4,559           | 4,094           | 465 (-158; 1088)                | 11.4 (-3.9; 26.6)              |
| SER                  | 895             | 871             | 24 (-95; 143)                   | 2.8 (-10.9; 16.4)              |
| SLO                  | 368             | 370             | -2 (-59; 55)                    | -0.5 (-15.9; 14.9)             |
| SPA                  | 3,947           | 3,730           | 217 (-270; 704)                 | 5.8 (-7.2; 18.9)               |
| SWI                  | 972             | 1,010           | -38 (-168; 92)                  | -3.8 (-16.6; 9.1)              |
| UK                   | 5,527           | 5,501           | 26 (-911; 963)                  | 0.5 (-16.6; 17.5)              |
| MAU                  | 135             | 110             | 25 (-6; 56)                     | 22.7 (-5.5; 50.9)              |
| ARG                  | 2,803           | 3,261           | -458 (-1176; 260)               | -14 (-36.1; 8.0)               |
| BRA                  | 13,816          | 13,769          | 47 (-2409; 2503)                | 0.3 (-17.5; 18.2)              |
| CHI                  | 1,602           | 1,835           | -233 (-574; 108)                | -12.7 (-31.3; 5.9)             |
| CUB                  | 1,556           | 1,473           | 83 (-110; 276)                  | 5.6 (-7.5; 18.7)               |
| GUA                  | 574             | 674             | -100 (-299; 99)                 | -14.8 (-44.4; 14.7)            |
| MEX                  | 7,739           | 7,134           | 605 (-968; 2178)                | 8.5 (-13.6; 30.5)              |
| USA                  | 45,977          | 49,960          | -3983 (-11,872; 3906)           | -8 (-23.8; 7.8)                |
| ISR                  | 437             | 417             | 20 (-74; 114)                   | 4.8 (-17.7; 27.3)              |
| JAP                  | 20,212          | 17,786          | 2426 (-76; 4928)                | 13.6 (-0.4; 27.7)              |
| KOR                  | 13,196          | 12,646          | 550 (-1280; 2380)               | 4.3 (-10.1; 18.8)              |
| AUS                  | 3,139           | 3,558           | -419 (-1014; 176)               | -11.8 (-28.5; 4.9)             |
| <i>All countries</i> | <i>147,615</i>  | <i>148,5747</i> | <i>-1132 (-13,427; 11,163)</i>  | <i>-0.8 (-9.0; 7.5)</i>        |

**Table 7.** Absolute and percent differences in the number of deaths from ill-defined causes registered in 2020 relative to the expected deaths, by country.

| Country              | Observed deaths | Expected deaths | Absolute difference<br>(95% CI) | Percent difference<br>(95% CI) |
|----------------------|-----------------|-----------------|---------------------------------|--------------------------------|
| AU                   | 3,074           | 2,836           | 238 (74; 401)                   | 8.4 (2.6; 14.1)                |
| BUL                  | 4,752           | 4,232           | 520 (181; 858)                  | 12.3 (4.3; 20.3)               |
| CZE                  | 3,676           | 1,992           | 1684 (1523; 1844)               | 84.5 (76.5; 92.6)              |
| DEN                  | 4,525           | 3,969           | 556 (203; 908)                  | 14 (5.1; 22.9)                 |
| EST                  | 237             | 330             | -93 (-148; -37)                 | -28.2 (-44.8; -11.2)           |
| FIN                  | 332             | 356             | -24 (-87; 39)                   | -6.7 (-24.4; 11.0)             |
| GEO                  | 6,718           | 7,812           | -1094 (-2059; -128)             | -14 (-26.4; -1.6)              |
| GER                  | 35,145          | 37,496          | -2351 (-4291; -410)             | -6.3 (-11.4; -1.1)             |
| ITA                  | 25,932          | 15,767          | 10,165 (9465; 10,864)           | 64.5 (60.0; 68.9)              |
| LAT                  | 326             | 167             | 159 (113; 204)                  | 95.2 (67.7; 122.2)             |
| LIT                  | 741             | 654             | 87 (-15; 189)                   | 13.3 (-2.3; 28.9)              |
| NET                  | 8,994           | 7,324           | 1670 (1290; 2049)               | 22.8 (17.6; 28.0)              |
| POL                  | 49,695          | 47,525          | 2170 (-1367; 5707)              | 4.6 (-2.9; 12.0)               |
| SER                  | 9,687           | 6,153           | 3534 (3027; 4040)               | 57.4 (49.2; 65.7)              |
| SLO                  | 611             | 709             | -98 (-177; -18)                 | -13.8 (-25.0; -2.5)            |
| SPA                  | 9,420           | 9,144           | 276 (-284; 836)                 | 3 (-3.1; 9.1)                  |
| SWI                  | 4,290           | 3,955           | 335 (97; 572)                   | 8.5 (2.5; 14.5)                |
| UK                   | 17,942          | 15,238          | 2704 (1915; 3492)               | 17.7 (12.6; 22.9)              |
| MAU                  | 514             | 128             | 386 (361; 410)                  | 301.6 (282.0; 320.3)           |
| ARG                  | 23,315          | 19,940          | 3375 (2159; 4590)               | 16.9 (10.8; 23.0)              |
| BRA                  | 89,629          | 70,680          | 18,949 (13,683; 24,214)         | 26.8 (19.4; 34.3)              |
| CHI                  | 2,920           | 2,703           | 217 (-46; 480)                  | 8 (-1.7; 17.8)                 |
| CUB                  | 1,091           | 1,084           | 7 (-103; 117)                   | 0.6 (-9.5; 10.8)               |
| GUA                  | 13,199          | 12,738          | 461 (-1140; 2062)               | 3.6 (-8.9; 16.2)               |
| MEX                  | 10,189          | 8,185           | 2004 (1344; 2663)               | 24.5 (16.4; 32.5)              |
| USA                  | 48,711          | 34,824          | 13,887 (9207; 18,566)           | 39.9 (26.4; 53.3)              |
| ISR                  | 2,914           | 2,979           | -65 (-321; 191)                 | -2.2 (-10.8; 6.4)              |
| JAP                  | 159,805         | 161,548         | -1743 (-5892; 2406)             | -1.1 (-3.6; 1.5)               |
| KOR                  | 33,883          | 27,791          | 6092 (4777; 7406)               | 21.9 (17.2; 26.6)              |
| AUS                  | 2,988           | 1,768           | 1220 (980; 1459)                | 69 (55.4; 82.5)                |
| <i>All countries</i> | <i>575,255</i>  | <i>510,154</i>  | <i>65,101 (9381; 120,820)</i>   | <i>12.8 (1.8; 23.7)</i>        |

**Table 8.** Absolute and percent differences in the number of deaths from any cause registered in 2020 relative to the expected deaths and COVID-19 deaths, by sex and age group (<75 vs ≥75 years) in countries with populations of ≥10 million.

| Sex/Age group | Country | Observed deaths | Expected deaths | Absolute difference (95% CI) | Percent difference (95% CI) | COVID-19 deaths | COVID-19 mortality rate (per 10,000) |
|---------------|---------|-----------------|-----------------|------------------------------|-----------------------------|-----------------|--------------------------------------|
| M, age<75     | CZE     | 32,711          | 29,586          | 3125 (2773; 3476)            | 10.6 (9.4; 11.7)            | 3,429           | 6.7                                  |
| F, age<75     | CZE     | 17,379          | 16,136          | 1243 (995; 1490)             | 7.7 (6.2; 9.2)              | 1,799           | 3.5                                  |
| M, age≥75     | CZE     | 33,888          | 27,466          | 6422 (6084; 6759)            | 23.4 (22.2; 24.6)           | 2,509           | 166.5                                |
| F, age≥75     | CZE     | 45,311          | 38,836          | 6475 (5960; 6989)            | 16.7 (15.3; 18.0)           | 2,802           | 95.4                                 |
| M, age<75     | GER     | 180,700         | 179,575         | 1125 (-1656; 3906)           | 0.6 (-0.9; 2.2)             | 8,077           | 2.1                                  |
| F, age<75     | GER     | 103,147         | 103,372         | -225 (-1830; 1380)           | -0.2 (-1.8; 1.3)            | 3,898           | 1.0                                  |
| M, age≥75     | GER     | 312,097         | 305,099         | 6998 (2618; 11,377)          | 2.3 (0.9; 3.7)              | 12,863          | 57.9                                 |
| F, age≥75     | GER     | 389,628         | 387,361         | 2267 (-2445; 6979)           | 0.6 (-0.6; 1.8)             | 14,920          | 41.6                                 |
| M, age<75     | ITA     | 111,240         | 95,725          | 15,515 (14,422; 16,607)      | 16.2 (15.1; 17.3)           | 20,606          | 7.5                                  |
| F, age<75     | ITA     | 64,012          | 59,228          | 4784 (3859; 5708)            | 8.1 (6.5; 9.6)              | 8,459           | 3.0                                  |
| M, age≥75     | ITA     | 248,694         | 211,005         | 37,689 (35,569; 39,808)      | 17.9 (16.9; 18.9)           | 23,286          | 140.7                                |
| F, age≥75     | ITA     | 316,497         | 275,288         | 41,209 (38,053; 44,364)      | 15.0 (13.8; 16.1)           | 25,790          | 93.3                                 |
| M, age<75     | NET     | 31,328          | 28,910          | 2418 (2019; 2816)            | 8.4 (7.0; 9.7)              | 4,335           | 5.2                                  |
| F, age<75     | NET     | 21,684          | 21,175          | 509 (110; 907)               | 2.4 (0.5; 4.3)              | 2,411           | 2.9                                  |
| M, age≥75     | NET     | 52,989          | 46,659          | 6330 (5729; 6930)            | 13.6 (12.3; 14.9)           | 6,446           | 185.2                                |
| F, age≥75     | NET     | 62,677          | 56,372          | 6305 (5420; 7189)            | 11.2 (9.6; 12.8)            | 6,981           | 133.1                                |
| M, age<75     | POL     | 146,021         | 125,568         | 20,453 (19,134; 21,771)      | 16.3 (15.2; 17.3)           | 15,583          | 8.7                                  |
| F, age<75     | POL     | 72,879          | 64,027          | 8852 (8075; 9628)            | 13.8 (12.6; 15.0)           | 8,284           | 4.5                                  |
| M, age≥75     | POL     | 103,723         | 84,650          | 19,073 (18,100; 20,045)      | 22.5 (21.4; 23.7)           | 8,383           | 157.4                                |
| F, age≥75     | POL     | 154,732         | 134,293         | 20,439 (19,005; 21,872)      | 15.2 (14.2; 16.3)           | 9,201           | 78.4                                 |
| M, age<75     | SPA     | 86,930          | 78,623          | 8307 (7277; 9336)            | 10.6 (9.3; 11.9)            | 15,574          | 7.0                                  |
| F, age<75     | SPA     | 43,602          | 38,702          | 4900 (4271; 5528)            | 12.7 (11.0; 14.3)           | 7,441           | 3.3                                  |
| M, age≥75     | SPA     | 162,734         | 136,364         | 26,370 (24,723; 28,016)      | 19.3 (18.1; 20.5)           | 23,343          | 220.2                                |
| F, age≥75     | SPA     | 200,510         | 171,028         | 29,482 (27,422; 31,541)      | 17.2 (16.0; 18.4)           | 28,481          | 158.7                                |
| M, age<75     | UK      | 131,409         | 118,786         | 12,623 (11,193; 14,052)      | 10.6 (9.4; 11.8)            | 19,902          | 6.3                                  |
| F, age<75     | UK      | 87,724          | 83,183          | 4541 (3345; 5736)            | 5.5 (4.0; 6.9)              | 11,395          | 3.6                                  |
| M, age≥75     | UK      | 217,025         | 192,882         | 24,143 (21,969; 26,316)      | 12.5 (11.4; 13.6)           | 24,934          | 181.3                                |
| F, age≥75     | UK      | 252,647         | 232,986         | 19,661 (16,871; 22,450)      | 8.4 (7.2; 9.6)              | 25,123          | 125.1                                |
| M, age<75     | ARG     | 109,144         | 100,072         | 9072 (7765; 10,378)          | 9.1 (7.8; 10.4)             | 21,737          | 10.0                                 |
| F, age<75     | ARG     | 67,217          | 62,557          | 4660 (3794; 5525)            | 7.4 (6.1; 8.8)              | 12,219          | 5.5                                  |
| M, age≥75     | ARG     | 84,669          | 75,936          | 8733 (7671; 9794)            | 11.5 (10.1; 12.9)           | 8,117           | 209.3                                |
| F, age≥75     | ARG     | 109,383         | 105,705         | 3678 (2323; 5032)            | 3.5 (2.2; 4.8)              | 10,271          | 127.8                                |
| M, age<75     | BRA     | 577,920         | 503,296         | 74,624 (69,605; 79,642)      | 14.8 (13.8; 15.8)           | 91,711          | 8.9                                  |
| F, age<75     | BRA     | 345,085         | 298,637         | 46,448 (44,394; 48,501)      | 15.6 (14.9; 16.2)           | 61,084          | 5.8                                  |
| M, age≥75     | BRA     | 294,414         | 256,770         | 37,644 (34,665; 40,622)      | 14.7 (13.5; 15.8)           | 29,910          | 193.1                                |
| F, age≥75     | BRA     | 336,722         | 316,358         | 20,364 (18,164; 22,563)      | 6.4 (5.7; 7.1)              | 29,966          | 114.8                                |
| M, age<75     | CHI     | 36,859          | 31,811          | 5048 (4628; 5467)            | 15.9 (14.5; 17.2)           | 7,546           | 8.2                                  |
| F, age<75     | CHI     | 21,998          | 19,577          | 2421 (2200; 2641)            | 12.4 (11.2; 13.5)           | 4,359           | 4.7                                  |
| M, age≥75     | CHI     | 30,772          | 26,068          | 4704 (4340; 5067)            | 18.0 (16.6; 19.4)           | 3,249           | 166.7                                |
| F, age≥75     | CHI     | 36,521          | 32,484          | 4037 (3697; 4376)            | 12.4 (11.4; 13.5)           | 3,526           | 102.9                                |
| M, age<75     | CUB     | 31,338          | 31,274          | 64 (-349; 477)               | 0.2 (-1.1; 1.5)             | 55              | 0.1                                  |
| F, age<75     | CUB     | 20,194          | 20,026          | 168 (-117; 453)              | 0.8 (-0.6; 2.3)             | 33              | 0.1                                  |
| M, age≥75     | CUB     | 30,153          | 30,714          | -561 (-975; -146)            | -1.8 (-3.2; -0.5)           | 30              | 1.7                                  |
| F, age≥75     | CUB     | 30,699          | 31,122          | -423 (-838; -7)              | -1.4 (-2.7; 0.0)            | 25              | 1.0                                  |

| Sex/Age group | Country | Observed deaths | Expected deaths | Absolute difference (95% CI) | Percent difference (95% CI) | COVID-19 deaths | COVID-19 mortality rate (per 10,000) |
|---------------|---------|-----------------|-----------------|------------------------------|-----------------------------|-----------------|--------------------------------------|
| M, age<75     | GUA     | 38,813          | 34,954          | 3859 (3191; 4526)            | 11.0 (9.1; 12.9)            | 5,042           | 5.8                                  |
| F, age<75     | GUA     | 25,929          | 25,154          | 775 (407; 1142)              | 3.1 (1.6; 4.5)              | 2,047           | 2.3                                  |
| M, age≥75     | GUA     | 16,142          | 13,014          | 3128 (2819; 3436)            | 24.0 (21.7; 26.4)           | 592             | 70.3                                 |
| F, age≥75     | GUA     | 14,776          | 14,224          | 552 (315; 788)               | 3.9 (2.2; 5.5)              | 299             | 27.2                                 |
| M, age<75     | MEX     | 435,769         | 280,149         | 155,620 (151,288; 159,951)   | 55.5 (54.0; 57.1)           | 114,047         | 18.3                                 |
| F, age<75     | MEX     | 253,392         | 177,785         | 75,607 (73,618; 77,595)      | 42.5 (41.4; 43.6)           | 61,213          | 9.5                                  |
| M, age≥75     | MEX     | 190,542         | 137,831         | 52,711 (50,215; 55,206)      | 38.2 (36.4; 40.1)           | 14,695          | 173.4                                |
| F, age≥75     | MEX     | 185,904         | 148,980         | 36,924 (35,168; 38,679)      | 24.8 (23.6; 26.0)           | 10,245          | 86.1                                 |
| M, age<75     | USA     | 946,027         | 788,739         | 157,288 (148,158; 166,417)   | 19.9 (18.8; 21.1)           | 118,839         | 7.5                                  |
| F, age<75     | USA     | 602,697         | 520,505         | 82,192 (77,768; 86,615)      | 15.8 (14.9; 16.6)           | 72,630          | 4.6                                  |
| M, age≥75     | USA     | 823,778         | 724,094         | 99,684 (90,978; 108,389)     | 13.8 (12.6; 15.0)           | 73,670          | 140.4                                |
| F, age≥75     | USA     | 1,011,111       | 890,580         | 120,531 (113,540; 127,521)   | 13.5 (12.7; 14.3)           | 85,688          | 108.5                                |
| M, age<75     | JAP     | 218,786         | 217,024         | 1762 (-625; 4149)            | 0.8 (-0.3; 1.9)             | 959             | 0.2                                  |
| F, age<75     | JAP     | 103,618         | 106,236         | -2618 (-4087; -1148)         | -2.5 (-3.8; -1.1)           | 310             | 0.1                                  |
| M, age≥75     | JAP     | 487,713         | 479,440         | 8273 (3653; 12892)           | 1.7 (0.8; 2.7)              | 1,135           | 2.7                                  |
| F, age≥75     | JAP     | 562,200         | 566,077         | -3877 (-9455; 1701)          | -0.7 (-1.7; 0.3)            | 1,062           | 1.4                                  |
| M, age<75     | KOR     | 80,497          | 81,029          | -532 (-1498; 434)            | -0.7 (-1.8; 0.5)            | 277             | 0.1                                  |
| F, age<75     | KOR     | 34,260          | 34,905          | -645 (-1295; 5)              | -1.8 (-3.7; 0.0)            | 155             | 0.1                                  |
| M, age≥75     | KOR     | 84,657          | 81,455          | 3202 (2210; 4193)            | 3.9 (2.7; 5.1)              | 206             | 3.3                                  |
| F, age≥75     | KOR     | 105,507         | 104,756         | 751 (-868; 2370)             | 0.7 (-0.8; 2.3)             | 312             | 2.5                                  |
| M, age<75     | AUS     | 34,026          | 34,826          | -800 (-1222; -377)           | -2.3 (-3.5; -1.1)           | 142             | 0.1                                  |
| F, age<75     | AUS     | 20,901          | 22,210          | -1309 (-1569; -1048)         | -5.9 (-7.1; -4.7)           | 72              | 0.1                                  |
| M, age≥75     | AUS     | 50,556          | 53,322          | -2766 (-3377; -2154)         | -5.2 (-6.3; -4.0)           | 297             | 6.8                                  |
| F, age≥75     | AUS     | 55,810          | 58,925          | -3115 (-3695; -2534)         | -5.3 (-6.3; -4.3)           | 388             | 6.4                                  |

**Table 9.** Absolute and percent differences in the number of deaths from neoplasms registered in 2020 relative to the expected deaths, by age group (<75 vs ≥75 years) in countries with population of ≥10 million.

| Sex/Age group | Country | Observed deaths | Expected deaths | Absolute difference (95% CI) | Percent difference (95% CI) |
|---------------|---------|-----------------|-----------------|------------------------------|-----------------------------|
| M, age<75     | CZE     | 9,521           | 9,671           | -150 (-474; 174)             | -1.6 (-4.9; 1.8)            |
| F, age<75     | CZE     | 6,741           | 6,766           | -25 (-334; 284)              | -0.4 (-4.9; 4.2)            |
| M, age≥75     | CZE     | 6,380           | 5,959           | 421 (200; 641)               | 7.1 (3.4; 10.8)             |
| F, age≥75     | CZE     | 6,074           | 5,926           | 148 (-133; 429)              | 2.5 (-2.2; 7.2)             |
| M, age<75     | GER     | 59,847          | 61,882          | -2035 (-3766; -303)          | -3.3 (-6.1; -0.5)           |
| F, age<75     | GER     | 45,341          | 47,319          | -1978 (-3919; -36)           | -4.2 (-8.3; -0.1)           |
| M, age≥75     | GER     | 70,069          | 68,968          | 1101 (-776; 2978)            | 1.6 (-1.1; 4.3)             |
| F, age≥75     | GER     | 64,295          | 64,237          | 58 (-2430; 2546)             | 0.1 (-3.8; 4.0)             |
| M, age<75     | ITA     | 40,886          | 42,514          | -1628 (-2742; -513)          | -3.8 (-6.4; -1.2)           |
| F, age<75     | ITA     | 31,320          | 31,960          | -640 (-1951; 671)            | -2.0 (-6.1; 2.1)            |
| M, age≥75     | ITA     | 56,219          | 56,303          | -84 (-1490; 1322)            | -0.1 (-2.6; 2.3)            |
| F, age≥75     | ITA     | 48,013          | 48,033          | -20 (-1857; 1817)            | 0.0 (-3.9; 3.8)             |
| M, age<75     | NET     | 12,226          | 12,694          | -468 (-879; -56)             | -3.7 (-6.9; -0.4)           |
| F, age<75     | NET     | 10,559          | 11,017          | -458 (-973; 57)              | -4.2 (-8.8; 0.5)            |
| M, age≥75     | NET     | 13,115          | 12,987          | 128 (-293; 549)              | 1.0 (-2.3; 4.2)             |
| F, age≥75     | NET     | 11,189          | 10,540          | 649 (150; 1147)              | 6.2 (1.4; 10.9)             |
| M, age<75     | POL     | 37,766          | 39,724          | -1958 (-3339; -576)          | -4.9 (-8.4; -1.5)           |
| F, age<75     | POL     | 28,333          | 30,028          | -1695 (-3096; -293)          | -5.6 (-10.3; -1.0)          |
| M, age≥75     | POL     | 21,242          | 20,243          | 999 (207; 1790)              | 4.9 (1.0; 8.8)              |
| F, age≥75     | POL     | 21,361          | 21,122          | 239 (-805; 1283)             | 1.1 (-3.8; 6.1)             |
| M, age<75     | SPA     | 32,877          | 34,048          | -1171 (-2131; -210)          | -3.4 (-6.3; -0.6)           |
| F, age<75     | SPA     | 20,036          | 19,710          | 326 (-579; 1231)             | 1.7 (-2.9; 6.2)             |
| M, age≥75     | SPA     | 34,370          | 33,898          | 472 (-491; 1435)             | 1.4 (-1.4; 4.2)             |
| F, age≥75     | SPA     | 25,458          | 25,390          | 68 (-1053; 1189)             | 0.3 (-4.1; 4.7)             |
| M, age<75     | UK      | 41,072          | 42,600          | -1528 (-2984; -71)           | -3.6 (-7.0; -0.2)           |
| F, age<75     | UK      | 35,917          | 37,157          | -1240 (-3073; 593)           | -3.3 (-8.3; 1.6)            |
| M, age≥75     | UK      | 50,851          | 50,512          | 339 (-1355; 2033)            | 0.7 (-2.7; 4.0)             |
| F, age≥75     | UK      | 44,461          | 44,155          | 306 (-1834; 2446)            | 0.7 (-4.2; 5.5)             |
| M, age<75     | ARG     | 19,735          | 21,557          | -1822 (-2874; -769)          | -8.5 (-13.3; -3.6)          |
| F, age<75     | ARG     | 18,846          | 19,425          | -579 (-2297; 1139)           | -3.0 (-11.8; 5.9)           |
| M, age≥75     | ARG     | 11,365          | 12,317          | -952 (-1617; -286)           | -7.7 (-13.1; -2.3)          |
| F, age≥75     | ARG     | 11,116          | 12,628          | -1512 (-2719; -304)          | -12.0 (-21.5; -2.4)         |
| M, age<75     | BRA     | 79,080          | 83,901          | -4821 (-8669; -972)          | -5.7 (-10.3; -1.2)          |
| F, age<75     | BRA     | 75,174          | 77,849          | -2675 (-9378; 4028)          | -3.4 (-12.0; 5.2)           |
| M, age≥75     | BRA     | 40,129          | 42,442          | -2313 (-4523; -102)          | -5.4 (-10.7; -0.2)          |
| F, age≥75     | BRA     | 34,903          | 37,862          | -2959 (-6700; 782)           | -7.8 (-17.7; 2.1)           |
| M, age<75     | CHI     | 8,130           | 8,510           | -380 (-708; -51)             | -4.5 (-8.3; -0.6)           |
| F, age<75     | CHI     | 7,632           | 7,765           | -133 (-604; 338)             | -1.7 (-7.8; 4.4)            |
| M, age≥75     | CHI     | 6,768           | 6,589           | 179 (-88; 446)               | 2.7 (-1.3; 6.8)             |
| F, age≥75     | CHI     | 6,126           | 6,013           | 113 (-269; 495)              | 1.9 (-4.5; 8.2)             |
| M, age<75     | CUB     | 8,824           | 8,813           | 11 (-258; 280)               | 0.1 (-2.9; 3.2)             |
| F, age<75     | CUB     | 7,000           | 6,891           | 109 (-282; 500)              | 1.6 (-4.1; 7.3)             |
| M, age≥75     | CUB     | 6,806           | 6,711           | 95 (-121; 311)               | 1.4 (-1.8; 4.6)             |
| F, age≥75     | CUB     | 4,564           | 4,629           | -65 (-348; 218)              | -1.4 (-7.5; 4.7)            |
| M, age<75     | GUA     | 2,672           | 2,535           | 137 (-81; 355)               | 5.4 (-3.2; 14.0)            |
| F, age<75     | GUA     | 3,613           | 3,465           | 148 (-288; 584)              | 4.3 (-8.3; 16.9)            |
| M, age≥75     | GUA     | 1,476           | 1,376           | 100 (-31; 231)               | 7.3 (-2.3; 16.8)            |
| F, age≥75     | GUA     | 1,183           | 1,193           | -10 (-194; 174)              | -0.8 (-16.3; 14.6)          |
| M, age<75     | MEX     | 30,396          | 30,731          | -335 (-1969; 1299)           | -1.1 (-6.4; 4.2)            |
| F, age<75     | MEX     | 35,311          | 35,974          | -663 (-3869; 2543)           | -1.8 (-10.8; 7.1)           |
| M, age≥75     | MEX     | 16,617          | 16,306          | 311 (-665; 1287)             | 1.9 (-4.1; 7.9)             |
| F, age≥75     | MEX     | 13,137          | 13,438          | -301 (-1754; 1152)           | -2.2 (-13.1; 8.6)           |
| M, age<75     | USA     | 183,942         | 187,094         | -3152 (-10286; 3982)         | -1.7 (-5.5; 2.1)            |
| F, age<75     | USA     | 159,022         | 161,177         | -2155 (-10947; 6637)         | -1.3 (-6.8; 4.1)            |
| M, age≥75     | USA     | 142,480         | 140,243         | 2237 (-3430; 7904)           | 1.6 (-2.4; 5.6)             |
| F, age≥75     | USA     | 133,176         | 133,315         | -139 (-7739; 7461)           | -0.1 (-5.8; 5.6)            |
| M, age<75     | JAP     | 86,569          | 89,442          | -2873 (-5159; -586)          | -3.2 (-5.8; -0.7)           |
| F, age<75     | JAP     | 52,591          | 53,336          | -745 (-2983; 1493)           | -1.4 (-5.6; 2.8)            |

| <b>Sex/Age group</b> | <b>Country</b> | <b>Observed deaths</b> | <b>Expected deaths</b> | <b>Absolute difference (95% CI)</b> | <b>Percent difference (95% CI)</b> |
|----------------------|----------------|------------------------|------------------------|-------------------------------------|------------------------------------|
| M, age $\geq$ 75     | JAP            | 141,458                | 135,923                | 5535 (2300; 8769)                   | 4.1 (1.7; 6.5)                     |
| F, age $\geq$ 75     | JAP            | 110,903                | 109,473                | 1430 (-2628; 5488)                  | 1.3 (-2.4; 5.0)                    |
| M, age<75            | KOR            | 28,146                 | 29,165                 | -1019 (-2202; 164)                  | -3.5 (-7.6; 0.6)                   |
| F, age<75            | KOR            | 14,921                 | 15,201                 | -280 (-1259; 699)                   | -1.8 (-8.3; 4.6)                   |
| M, age $\geq$ 75     | KOR            | 23,538                 | 22,112                 | 1426 (485; 2366)                    | 6.4 (2.2; 10.7)                    |
| F, age $\geq$ 75     | KOR            | 17,166                 | 17,059                 | 107 (-966; 1180)                    | 0.6 (-5.7; 6.9)                    |
| M, age<75            | AUS            | 12,631                 | 13,256                 | -625 (-1127; -122)                  | -4.7 (-8.5; -0.9)                  |
| F, age<75            | AUS            | 9,875                  | 10,540                 | -665 (-1241; -88)                   | -6.3 (-11.8; -0.8)                 |
| M, age $\geq$ 75     | AUS            | 14,773                 | 14,832                 | -59 (-615; 497)                     | -0.4 (-4.1; 3.4)                   |
| F, age $\geq$ 75     | AUS            | 11,509                 | 11,350                 | 159 (-459; 777)                     | 1.4 (-4.0; 6.8)                    |

**Table 10.** Absolute and percent differences in the number of deaths from cardiovascular diseases registered in 2020 relative to the expected deaths, by age group (<75 vs ≥75 years) in countries with population ≥10 million.

| Sex/Age group | Country | Observed deaths | Expected deaths | Absolute difference (95% CI) | Percent difference (95% CI) |
|---------------|---------|-----------------|-----------------|------------------------------|-----------------------------|
| M, age<75     | CZE     | 9,691           | 9,053           | 638 (323; 952)               | 7.0 (3.6; 10.5)             |
| F, age<75     | CZE     | 4,201           | 4,158           | 43 (-95; 181)                | 1.0 (-2.3; 4.4)             |
| M, age≥75     | CZE     | 14,142          | 12,760          | 1382 (958; 1805)             | 10.8 (7.5; 14.1)            |
| F, age≥75     | CZE     | 22,310          | 20,185          | 2125 (1626; 2623)            | 10.5 (8.1; 13.0)            |
| M, age<75     | GER     | 43,001          | 42,227          | 774 (-788; 2336)             | 1.8 (-1.9; 5.5)             |
| F, age<75     | GER     | 18,182          | 17,996          | 186 (-404; 776)              | 1.0 (-2.2; 4.3)             |
| M, age≥75     | GER     | 114,555         | 116,852         | -2297 (-5899; 1305)          | -2.0 (-5.0; 1.1)            |
| F, age≥75     | GER     | 162,263         | 165,456         | -3193 (-6566; 180)           | -1.9 (-4.0; 0.1)            |
| M, age<75     | ITA     | 22,143          | 21,650          | 493 (-297; 1283)             | 2.3 (-1.4; 5.9)             |
| F, age<75     | ITA     | 9,983           | 10,246          | -263 (-579; 53)              | -2.6 (-5.7; 0.5)            |
| M, age≥75     | ITA     | 75,787          | 75,019          | 768 (-1422; 2958)            | 1.0 (-1.9; 3.9)             |
| F, age≥75     | ITA     | 117,331         | 113,891         | 3440 (1416; 5463)            | 3.0 (1.2; 4.8)              |
| M, age<75     | NET     | 5,358           | 5,457           | -99 (-312; 114)              | -1.8 (-5.7; 2.1)            |
| F, age<75     | NET     | 2,699           | 2,843           | -144 (-252; -35)             | -5.1 (-8.9; -1.2)           |
| M, age≥75     | NET     | 12,038          | 12,326          | -288 (-709; 133)             | -2.3 (-5.8; 1.1)            |
| F, age≥75     | NET     | 15,186          | 15,742          | -556 (-977; -134)            | -3.5 (-6.2; -0.9)           |
| M, age<75     | POL     | 39,246          | 35,846          | 3400 (1564; 5235)            | 9.5 (4.4; 14.6)             |
| F, age<75     | POL     | 17,203          | 16,237          | 966 (443; 1488)              | 5.9 (2.7; 9.2)              |
| M, age≥75     | POL     | 42,156          | 37,923          | 4233 (2318; 6147)            | 11.2 (6.1; 16.2)            |
| F, age≥75     | POL     | 75,794          | 70,481          | 5313 (3623; 7002)            | 7.5 (5.1; 9.9)              |
| M, age<75     | SPA     | 17,297          | 16,236          | 1061 (416; 1705)             | 6.5 (2.6; 10.5)             |
| F, age<75     | SPA     | 6,597           | 6,161           | 436 (238; 633)               | 7.1 (3.9; 10.3)             |
| M, age≥75     | SPA     | 38,649          | 38,678          | -29 (-1349; 1291)            | -0.1 (-3.5; 3.3)            |
| F, age≥75     | SPA     | 57,310          | 56,090          | 1220 (122; 2317)             | 2.2 (0.2; 4.1)              |
| M, age<75     | UK      | 31,031          | 27,413          | 3618 (2301; 4934)            | 13.2 (8.4; 18.0)            |
| F, age<75     | UK      | 14,190          | 12,599          | 1591 (1113; 2068)            | 12.6 (8.8; 16.4)            |
| M, age≥75     | UK      | 49,966          | 50,944          | -978 (-3199; 1243)           | -1.9 (-6.3; 2.4)            |
| F, age≥75     | UK      | 56,454          | 56,799          | -345 (-1969; 1279)           | -0.6 (-3.5; 2.3)            |
| M, age<75     | ARG     | 23,164          | 23,740          | -576 (-1956; 804)            | -2.4 (-8.2; 3.4)            |
| F, age<75     | ARG     | 12,154          | 12,175          | -21 (-556; 514)              | -0.2 (-4.6; 4.2)            |
| M, age≥75     | ARG     | 24,624          | 24,517          | 107 (-1313; 1527)            | 0.4 (-5.4; 6.2)             |
| F, age≥75     | ARG     | 35,722          | 35,719          | 3 (-1289; 1295)              | 0.0 (-3.6; 3.6)             |
| M, age<75     | BRA     | 109,960         | 112,120         | -2160 (-10318; 5998)         | -1.9 (-9.2; 5.3)            |
| F, age<75     | BRA     | 71,690          | 73,055          | -1365 (-5946; 3216)          | -1.9 (-8.1; 4.4)            |
| M, age≥75     | BRA     | 79,135          | 81,951          | -2816 (-9111; 3479)          | -3.4 (-11.1; 4.2)           |
| F, age≥75     | BRA     | 96,765          | 101,469         | -4704 (-10713; 1305)         | -4.6 (-10.6; 1.3)           |
| M, age<75     | CHI     | 6,819           | 6,950           | -131 (-546; 284)             | -1.9 (-7.9; 4.1)            |
| F, age<75     | CHI     | 3,564           | 3,666           | -102 (-261; 57)              | -2.8 (-7.1; 1.6)            |
| M, age≥75     | CHI     | 7,864           | 7,657           | 207 (-244; 658)              | 2.7 (-3.2; 8.6)             |
| F, age≥75     | CHI     | 10,771          | 10,248          | 523 (153; 892)               | 5.1 (1.5; 8.7)              |
| M, age<75     | CUB     | 10,560          | 9,889           | 671 (201; 1140)              | 6.8 (2.0; 11.5)             |
| F, age<75     | CUB     | 6,508           | 6,007           | 501 (292; 709)               | 8.3 (4.9; 11.8)             |
| M, age≥75     | CUB     | 12,972          | 12,260          | 712 (148; 1275)              | 5.8 (1.2; 10.4)             |
| F, age≥75     | CUB     | 14,336          | 13,481          | 855 (448; 1261)              | 6.3 (3.3; 9.4)              |
| M, age<75     | GUA     | 4,396           | 3,358           | 1038 (703; 1372)             | 30.9 (20.9; 40.9)           |
| F, age<75     | GUA     | 3,236           | 2,898           | 338 (107; 568)               | 11.7 (3.7; 19.6)            |
| M, age≥75     | GUA     | 4,552           | 3,631           | 921 (568; 1273)              | 25.4 (15.6; 35.1)           |
| F, age≥75     | GUA     | 4,268           | 3,924           | 344 (49; 638)                | 8.8 (1.2; 16.3)             |
| M, age<75     | MEX     | 71,563          | 53,507          | 18056 (13708; 22403)         | 33.7 (25.6; 41.9)           |
| F, age<75     | MEX     | 40,795          | 33,434          | 7361 (5663; 9058)            | 22.0 (16.9; 27.1)           |
| M, age≥75     | MEX     | 68,256          | 51,481          | 16775 (12561; 20988)         | 32.6 (24.4; 40.8)           |
| F, age≥75     | MEX     | 74,177          | 60,026          | 14151 (11413; 16888)         | 23.6 (19.0; 28.1)           |
| M, age<75     | USA     | 224,638         | 207,196         | 17442 (5146; 29737)          | 8.4 (2.5; 14.4)             |
| F, age<75     | USA     | 120,446         | 110,842         | 9604 (4472; 14735)           | 8.7 (4.0; 13.3)             |
| M, age≥75     | USA     | 253,942         | 252,175         | 1767 (-12775; 16309)         | 0.7 (-5.1; 6.5)             |
| F, age≥75     | USA     | 313,627         | 311,310         | 2317 (-9658; 14292)          | 0.7 (-3.1; 4.6)             |
| M, age<75     | JAP     | 51,020          | 47,107          | 3913 (1924; 5901)            | 8.3 (4.1; 12.5)             |
| F, age<75     | JAP     | 18,689          | 18,362          | 327 (-205; 859)              | 1.8 (-1.1; 4.7)             |

| <b>Sex/Age group</b> | <b>Country</b> | <b>Observed deaths</b> | <b>Expected deaths</b> | <b>Absolute difference (95% CI)</b> | <b>Percent difference (95% CI)</b> |
|----------------------|----------------|------------------------|------------------------|-------------------------------------|------------------------------------|
| M, age $\geq$ 75     | JAP            | 115,820                | 115,463                | 357 (-3812; 4526)                   | 0.3 (-3.3; 3.9)                    |
| F, age $\geq$ 75     | JAP            | 159,251                | 161,505                | -2254 (-5210; 702)                  | -1.4 (-3.2; 0.4)                   |
| M, age<75            | KOR            | 12,312                 | 12,544                 | -232 (-977; 513)                    | -1.8 (-7.8; 4.1)                   |
| F, age<75            | KOR            | 4,754                  | 5,361                  | -607 (-834; -379)                   | -11.3 (-15.6; -7.1)                |
| M, age $\geq$ 75     | KOR            | 16,182                 | 16,872                 | -690 (-1642; 262)                   | -4.1 (-9.7; 1.6)                   |
| F, age $\geq$ 75     | KOR            | 26,794                 | 27,539                 | -745 (-1601; 111)                   | -2.7 (-5.8; 0.4)                   |
| M, age<75            | AUS            | 6,696                  | 6,630                  | 66 (-307; 439)                      | 1.0 (-4.6; 6.6)                    |
| F, age<75            | AUS            | 2,903                  | 2,920                  | -17 (-145; 111)                     | -0.6 (-5.0; 3.8)                   |
| M, age $\geq$ 75     | AUS            | 13,727                 | 15,088                 | -1361 (-2101; -620)                 | -9.0 (-13.9; -4.1)                 |
| F, age $\geq$ 75     | AUS            | 16,962                 | 18,252                 | -1290 (-1836; -743)                 | -7.1 (-10.1; -4.1)                 |



**Table 11.** Absolute and percent differences in the number of deaths from ischemic heart diseases registered in 2020 relative to the expected deaths, by age group (<75 vs ≥75 years) in countries with population of ≥10 million.

| Sex/Age group | Country | Observed deaths | Expected deaths | Absolute difference (95% CI) | Percent difference (95% CI) |
|---------------|---------|-----------------|-----------------|------------------------------|-----------------------------|
| M, age<75     | CZE     | 4,693           | 4,538           | 155 (-11; 321)               | 3.4 (-0.2; 7.1)             |
| F, age<75     | CZE     | 1,576           | 1,635           | -59 (-120; 2)                | -3.6 (-7.3; 0.1)            |
| M, age≥75     | CZE     | 7,152           | 6,525           | 627 (399; 854)               | 9.6 (6.1; 13.1)             |
| F, age≥75     | CZE     | 9,932           | 9,302           | 630 (381; 878)               | 6.8 (4.1; 9.4)              |
| M, age<75     | GER     | 21,183          | 20,508          | 675 (-133; 1483)             | 3.3 (-0.6; 7.2)             |
| F, age<75     | GER     | 6,241           | 5,902           | 339 (137; 540)               | 5.7 (2.3; 9.1)              |
| M, age≥75     | GER     | 47,416          | 48,338          | -922 (-2558; 714)            | -1.9 (-5.3; 1.5)            |
| F, age≥75     | GER     | 46,622          | 47,469          | -847 (-1898; 204)            | -1.8 (-4.0; 0.4)            |
| M, age<75     | ITA     | 9,476           | 8,691           | 785 (448; 1121)              | 9.0 (5.2; 12.9)             |
| F, age<75     | ITA     | 2,887           | 2,575           | 312 (232; 391)               | 12.1 (9.0; 15.2)            |
| M, age≥75     | ITA     | 24,299          | 23,402          | 897 (130; 1663)              | 3.8 (0.6; 7.1)              |
| F, age≥75     | ITA     | 26,694          | 25,546          | 1148 (664; 1631)             | 4.5 (2.6; 6.4)              |
| M, age<75     | NET     | 1,935           | 1,833           | 102 (7; 196)                 | 5.6 (0.4; 10.7)             |
| F, age<75     | NET     | 676             | 619             | 57 (26; 87)                  | 9.2 (4.2; 14.1)             |
| M, age≥75     | NET     | 3,021           | 2,946           | 75 (-66; 216)                | 2.5 (-2.2; 7.3)             |
| F, age≥75     | NET     | 2,405           | 2,410           | -5 (-97; 87)                 | -0.2 (-4.0; 3.6)            |
| M, age<75     | POL     | 15,105          | 12,037          | 3068 (2435; 3700)            | 25.5 (20.2; 30.7)           |
| F, age<75     | POL     | 5,465           | 4,549           | 916 (683; 1148)              | 20.1 (15.0; 25.2)           |
| M, age≥75     | POL     | 13,381          | 9,796           | 3585 (3054; 4115)            | 36.6 (31.2; 42.0)           |
| F, age≥75     | POL     | 20,452          | 15,390          | 5062 (4442; 5681)            | 32.9 (28.9; 36.9)           |
| M, age<75     | SPA     | 7,429           | 6,777           | 652 (333; 970)               | 9.6 (4.9; 14.3)             |
| F, age<75     | SPA     | 1,716           | 1,559           | 157 (92; 221)                | 10.1 (5.9; 14.2)            |
| M, age≥75     | SPA     | 10,694          | 10,951          | -257 (-734; 220)             | -2.3 (-6.7; 2.0)            |
| F, age≥75     | SPA     | 9,815           | 9,931           | -116 (-399; 167)             | -1.2 (-4.0; 1.7)            |
| M, age<75     | UK      | 18,272          | 15,785          | 2487 (1656; 3317)            | 15.8 (10.5; 21.0)           |
| F, age<75     | UK      | 5,685           | 4,785           | 900 (691; 1108)              | 18.8 (14.4; 23.2)           |
| M, age≥75     | UK      | 22,761          | 23,498          | -737 (-1905; 431)            | -3.1 (-8.1; 1.8)            |
| F, age≥75     | UK      | 17,332          | 17,809          | -477 (-1096; 142)            | -2.7 (-6.2; 0.8)            |
| M, age<75     | ARG     | 7,309           | 7,776           | -467 (-1003; 69)             | -6.0 (-12.9; 0.9)           |
| F, age<75     | ARG     | 2,796           | 2,892           | -96 (-243; 51)               | -3.3 (-8.4; 1.8)            |
| M, age≥75     | ARG     | 5,481           | 5,563           | -82 (-489; 325)              | -1.5 (-8.8; 5.8)            |
| F, age≥75     | ARG     | 6,934           | 6,576           | 358 (68; 647)                | 5.4 (1.0; 9.8)              |
| M, age<75     | BRA     | 42,900          | 46,220          | -3320 (-7158; 518)           | -7.2 (-15.5; 1.1)           |
| F, age<75     | BRA     | 21,599          | 23,744          | -2145 (-3754; -535)          | -9.0 (-15.8; -2.3)          |
| M, age≥75     | BRA     | 22,215          | 24,398          | -2183 (-4462; 96)            | -8.9 (-18.3; 0.4)           |
| F, age≥75     | BRA     | 22,776          | 25,923          | -3147 (-4877; -1416)         | -12.1 (-18.8; -5.5)         |
| M, age<75     | CHI     | 2,866           | 3,029           | -163 (-382; 56)              | -5.4 (-12.6; 1.8)           |
| F, age<75     | CHI     | 1,004           | 1,078           | -74 (-133; -14)              | -6.9 (-12.3; -1.3)          |
| M, age≥75     | CHI     | 2,033           | 2,124           | -91 (-254; 72)               | -4.3 (-12.0; 3.4)           |
| F, age≥75     | CHI     | 2,056           | 2,109           | -53 (-157; 51)               | -2.5 (-7.4; 2.4)            |
| M, age<75     | CUB     | 4,656           | 4,396           | 260 (27; 492)                | 5.9 (0.6; 11.2)             |
| F, age<75     | CUB     | 2,609           | 2,407           | 202 (114; 289)               | 8.4 (4.7; 12.0)             |
| M, age≥75     | CUB     | 5,414           | 4,981           | 433 (173; 692)               | 8.7 (3.5; 13.9)             |
| F, age≥75     | CUB     | 6,102           | 5,520           | 582 (406; 757)               | 10.5 (7.4; 13.7)            |
| M, age<75     | GUA     | 2,255           | 1,621           | 634 (413; 854)               | 39.1 (25.5; 52.7)           |
| F, age<75     | GUA     | 1,386           | 1,144           | 242 (123; 360)               | 21.2 (10.8; 31.5)           |
| M, age≥75     | GUA     | 2,348           | 1,712           | 636 (408; 863)               | 37.1 (23.8; 50.4)           |
| F, age≥75     | GUA     | 2,061           | 1,715           | 346 (182; 509)               | 20.2 (10.6; 29.7)           |
| M, age<75     | MEX     | 48,274          | 34,080          | 14,194 (11027; 17,360)       | 41.6 (32.4; 50.9)           |
| F, age<75     | MEX     | 23,677          | 17,143          | 6534 (5503; 7564)            | 38.1 (32.1; 44.1)           |
| M, age≥75     | MEX     | 45,896          | 31,728          | 14,168 (11,181; 17,154)      | 44.7 (35.2; 54.1)           |
| F, age≥75     | MEX     | 45,838          | 34,937          | 10,901 (9071; 12,730)        | 31.2 (26.0; 36.4)           |
| M, age<75     | USA     | 112,662         | 101,482         | 11,180 (5091; 17,268)        | 11.0 (5.0; 17.0)            |
| F, age<75     | USA     | 47,074          | 40,484          | 6590 (4731; 8448)            | 16.3 (11.7; 20.9)           |
| M, age≥75     | USA     | 115,213         | 112,325         | 2888 (-3780; 9556)           | 2.6 (-3.4; 8.5)             |
| F, age≥75     | USA     | 107,854         | 103,975         | 3879 (-196; 7954)            | 3.7 (-0.2; 7.6)             |
| M, age<75     | JAP     | 15,860          | 14,369          | 1491 (791; 2190)             | 10.4 (5.5; 15.2)            |
| F, age<75     | JAP     | 4,058           | 3,777           | 281 (162; 399)               | 7.4 (4.3; 10.6)             |

| <b>Sex/Age group</b> | <b>Country</b> | <b>Observed deaths</b> | <b>Expected deaths</b> | <b>Absolute difference (95% CI)</b> | <b>Percent difference (95% CI)</b> |
|----------------------|----------------|------------------------|------------------------|-------------------------------------|------------------------------------|
| M, age $\geq$ 75     | JAP            | 24,318                 | 24,108                 | 210 (-865; 1285)                    | 0.9 (-3.6; 5.3)                    |
| F, age $\geq$ 75     | JAP            | 23,042                 | 23,059                 | -17 (-529; 495)                     | -0.1 (-2.3; 2.1)                   |
| M, age<75            | KOR            | 4,096                  | 3,900                  | 196 (-99; 491)                      | 5.0 (-2.5; 12.6)                   |
| F, age<75            | KOR            | 955                    | 995                    | -40 (-87; 7)                        | -4.0 (-8.7; 0.7)                   |
| M, age $\geq$ 75     | KOR            | 3,863                  | 4,132                  | -269 (-579; 41)                     | -6.5 (-14.0; 1.0)                  |
| F, age $\geq$ 75     | KOR            | 5,141                  | 5,293                  | -152 (-336; 32)                     | -2.9 (-6.3; 0.6)                   |
| M, age<75            | AUS            | 3,759                  | 3,650                  | 109 (-133; 351)                     | 3.0 (-3.6; 9.6)                    |
| F, age<75            | AUS            | 1,015                  | 994                    | 21 (-30; 72)                        | 2.1 (-3.0; 7.2)                    |
| M, age $\geq$ 75     | AUS            | 6,281                  | 6,874                  | -593 (-1005; -180)                  | -8.6 (-14.6; -2.6)                 |
| F, age $\geq$ 75     | AUS            | 5,532                  | 6,178                  | -646 (-865; -426)                   | -10.5 (-14.0; -6.9)                |

**Table 12.** Absolute and percent differences in the number of deaths from cerebrovascular diseases registered in 2020 relative to the expected deaths, by age group (<75 vs ≥75 years) in countries with population ≥10 million.

| Sex/Age group | Country | Observed deaths | Expected deaths | Absolute difference (95% CI) | Percent difference (95% CI) |
|---------------|---------|-----------------|-----------------|------------------------------|-----------------------------|
| M, age<75     | CZE     | 1,308           | 1,157           | 151 (102; 199)               | 13.1 (8.8; 17.2)            |
| F, age<75     | CZE     | 719             | 661             | 58 (30; 85)                  | 8.8 (4.5; 12.9)             |
| M, age≥75     | CZE     | 2,048           | 2,002           | 46 (-31; 123)                | 2.3 (-1.5; 6.1)             |
| F, age≥75     | CZE     | 3,477           | 3,391           | 86 (-20; 192)                | 2.5 (-0.6; 5.7)             |
| M, age<75     | GER     | 6,247           | 5,743           | 504 (300; 707)               | 8.8 (5.2; 12.3)             |
| F, age<75     | GER     | 3,952           | 3,481           | 471 (346; 595)               | 13.5 (9.9; 17.1)            |
| M, age≥75     | GER     | 17,082          | 17,885          | -803 (-1319; -286)           | -4.5 (-7.4; -1.6)           |
| F, age≥75     | GER     | 26,027          | 26,723          | -696 (-1324; -67)            | -2.6 (-5.0; -0.3)           |
| M, age<75     | ITA     | 4,397           | 3,745           | 652 (522; 781)               | 17.4 (13.9; 20.9)           |
| F, age<75     | ITA     | 2,954           | 2,600           | 354 (266; 441)               | 13.6 (10.2; 17.0)           |
| M, age≥75     | ITA     | 18,513          | 18,123          | 390 (-75; 855)               | 2.2 (-0.4; 4.7)             |
| F, age≥75     | ITA     | 31,197          | 30,023          | 1174 (597; 1750)             | 3.9 (2.0; 5.8)              |
| M, age<75     | NET     | 1,089           | 1,091           | -2 (-53; 49)                 | -0.2 (-4.9; 4.5)            |
| F, age<75     | NET     | 799             | 814             | -15 (-53; 23)                | -1.8 (-6.5; 2.8)            |
| M, age≥75     | NET     | 2,736           | 2,982           | -246 (-364; -127)            | -8.2 (-12.2; -4.3)          |
| F, age≥75     | NET     | 4,226           | 4,482           | -256 (-404; -107)            | -5.7 (-9.0; -2.4)           |
| M, age<75     | POL     | 7,694           | 6,287           | 1407 (1059; 1754)            | 22.4 (16.8; 27.9)           |
| F, age<75     | POL     | 4,050           | 3,464           | 586 (443; 728)               | 16.9 (12.8; 21.0)           |
| M, age≥75     | POL     | 7,052           | 6,035           | 1017 (682; 1351)             | 16.9 (11.3; 22.4)           |
| F, age≥75     | POL     | 13,744          | 11,434          | 2310 (1932; 2687)            | 20.2 (16.9; 23.5)           |
| M, age<75     | SPA     | 2,987           | 2,704           | 283 (179; 386)               | 10.5 (6.6; 14.3)            |
| F, age<75     | SPA     | 1,721           | 1,522           | 199 (143; 254)               | 13.1 (9.4; 16.7)            |
| M, age≥75     | SPA     | 8,277           | 8,186           | 91 (-166; 348)               | 1.1 (-2.0; 4.3)             |
| F, age≥75     | SPA     | 12,832          | 12,591          | 241 (-50; 532)               | 1.9 (-0.4; 4.2)             |
| M, age<75     | UK      | 4,392           | 3,852           | 540 (358; 721)               | 14.0 (9.3; 18.7)            |
| F, age<75     | UK      | 3,378           | 2,972           | 406 (282; 529)               | 13.7 (9.5; 17.8)            |
| M, age≥75     | UK      | 10,671          | 11,282          | -611 (-1054; -167)           | -5.4 (-9.3; -1.5)           |
| F, age≥75     | UK      | 16,019          | 16,371          | -352 (-841; 137)             | -2.2 (-5.1; 0.8)            |
| M, age<75     | ARG     | 4,736           | 5,204           | -468 (-807; -128)            | -9.0 (-15.5; -2.5)          |
| F, age<75     | ARG     | 2,912           | 3,206           | -294 (-493; -94)             | -9.2 (-15.4; -2.9)          |
| M, age≥75     | ARG     | 4,165           | 4,834           | -669 (-989; -348)            | -13.8 (-20.5; -7.2)         |
| F, age≥75     | ARG     | 5,666           | 6,739           | -1073 (-1441; -704)          | -15.9 (-21.4; -10.4)        |
| M, age<75     | BRA     | 27,301          | 26,766          | 535 (-1202; 2272)            | 2.0 (-4.5; 8.5)             |
| F, age<75     | BRA     | 20,444          | 20,268          | 176 (-1247; 1599)            | 0.9 (-6.2; 7.9)             |
| M, age≥75     | BRA     | 23,442          | 24,278          | -836 (-2437; 765)            | -3.4 (-10.0; 3.2)           |
| F, age≥75     | BRA     | 27,625          | 29,460          | -1835 (-3776; 106)           | -6.2 (-12.8; 0.4)           |
| M, age<75     | CHI     | 1,637           | 1,687           | -50 (-153; 53)               | -3.0 (-9.1; 3.1)            |
| F, age<75     | CHI     | 1,048           | 1,094           | -46 (-112; 20)               | -4.2 (-10.2; 1.8)           |
| M, age≥75     | CHI     | 2,250           | 2,205           | 45 (-84; 174)                | 2.0 (-3.8; 7.9)             |
| F, age≥75     | CHI     | 3,013           | 2,819           | 194 (49; 338)                | 6.9 (1.7; 12.0)             |
| M, age<75     | CUB     | 2,482           | 2,254           | 228 (117; 338)               | 10.1 (5.2; 15.0)            |
| F, age<75     | CUB     | 1,652           | 1,467           | 185 (124; 245)               | 12.6 (8.5; 16.7)            |
| M, age≥75     | CUB     | 3,203           | 3,109           | 94 (-50; 238)                | 3.0 (-1.6; 7.7)             |
| F, age≥75     | CUB     | 3,638           | 3,494           | 144 (20; 267)                | 4.1 (0.6; 7.6)              |
| M, age<75     | GUA     | 894             | 778             | 116 (34; 197)                | 14.9 (4.4; 25.3)            |
| F, age<75     | GUA     | 836             | 750             | 86 (11; 160)                 | 11.5 (1.5; 21.3)            |

| Sex/Age group    | Country | Observed deaths | Expected deaths | Absolute difference (95% CI) | Percent difference (95% CI) |
|------------------|---------|-----------------|-----------------|------------------------------|-----------------------------|
| M, age $\geq$ 75 | GUA     | 969             | 843             | 126 (39; 212)                | 14.9 (4.6; 25.1)            |
| F, age $\geq$ 75 | GUA     | 907             | 900             | 7 (-79; 93)                  | 0.8 (-8.8; 10.3)            |
| M, age<75        | MEX     | 9,553           | 8,876           | 677 (24; 1329)               | 7.6 (0.3; 15.0)             |
| F, age<75        | MEX     | 6,754           | 6,927           | -173 (-548; 202)             | -2.5 (-7.9; 2.9)            |
| M, age $\geq$ 75 | MEX     | 8,942           | 8,851           | 91 (-560; 742)               | 1.0 (-6.3; 8.4)             |
| F, age $\geq$ 75 | MEX     | 10,933          | 10,858          | 75 (-470; 620)               | 0.7 (-4.3; 5.7)             |
| M, age<75        | USA     | 27,555          | 25,632          | 1923 (661; 3184)             | 7.5 (2.6; 12.4)             |
| F, age<75        | USA     | 21,678          | 20,621          | 1057 (176; 1937)             | 5.1 (0.9; 9.4)              |
| M, age $\geq$ 75 | USA     | 42,080          | 40,472          | 1608 (-240; 3456)            | 4.0 (-0.6; 8.5)             |
| F, age $\geq$ 75 | USA     | 68,949          | 67,267          | 1682 (-619; 3983)            | 2.5 (-0.9; 5.9)             |
| M, age<75        | JAP     | 15,295          | 13,716          | 1579 (919; 2238)             | 11.5 (6.7; 16.3)            |
| F, age<75        | JAP     | 6,826           | 6,118           | 708 (486; 929)               | 11.6 (7.9; 15.2)            |
| M, age $\geq$ 75 | JAP     | 35,079          | 35,363          | -284 (-1732; 1164)           | -0.8 (-4.9; 3.3)            |
| F, age $\geq$ 75 | JAP     | 45,760          | 46,323          | -563 (-1684; 558)            | -1.2 (-3.6; 1.2)            |
| M, age<75        | KOR     | 4,499           | 4,288           | 211 (-70; 492)               | 4.9 (-1.6; 11.5)            |
| F, age<75        | KOR     | 2,193           | 2,190           | 3 (-107; 113)                | 0.1 (-4.9; 5.2)             |
| M, age $\geq$ 75 | KOR     | 6,130           | 6,154           | -24 (-404; 356)              | -0.4 (-6.6; 5.8)            |
| F, age $\geq$ 75 | KOR     | 9,036           | 8,856           | 180 (-171; 531)              | 2.0 (-1.9; 6.0)             |
| M, age<75        | AUS     | 1,003           | 959             | 44 (-8; 96)                  | 4.6 (-0.8; 10.0)            |
| F, age<75        | AUS     | 760             | 732             | 28 (-8; 64)                  | 3.8 (-1.1; 8.7)             |
| M, age $\geq$ 75 | AUS     | 2,971           | 3,181           | -210 (-350; -69)             | -6.6 (-11.0; -2.2)          |
| F, age $\geq$ 75 | AUS     | 4,735           | 4,934           | -199 (-365; -32)             | -4.0 (-7.4; -0.6)           |

**Table 13.** Absolute and percent differences in the number of deaths from diabetes registered in 2020 relative to the expected deaths, by age group (<75 vs ≥75 years) in countries with population ≥10 million.

| Sex/Age group | Country | Observed deaths | Expected deaths | Absolute difference<br>(95% CI) | Percent difference<br>(95% CI) |
|---------------|---------|-----------------|-----------------|---------------------------------|--------------------------------|
| M, age<75     | CZE     | 966             | 1,010           | -44 (-109; 21)                  | -4.4 (-10.8; 2.1)              |
| F, age<75     | CZE     | 574             | 615             | -41 (-85; 3)                    | -6.7 (-13.8; 0.5)              |
| M, age≥75     | CZE     | 1,352           | 1,208           | 144 (67; 220)                   | 11.9 (5.5; 18.2)               |
| F, age≥75     | CZE     | 2,101           | 1,947           | 154 (40; 267)                   | 7.9 (2.1; 13.7)                |
| M, age<75     | GER     | 3,904           | 3,801           | 103 (-44; 250)                  | 2.7 (-1.2; 6.6)                |
| F, age<75     | GER     | 1,815           | 1,640           | 175 (111; 238)                  | 10.7 (6.8; 14.5)               |
| M, age≥75     | GER     | 8,263           | 8,063           | 200 (-71; 471)                  | 2.5 (-0.9; 5.8)                |
| F, age≥75     | GER     | 11,825          | 11,168          | 657 (366; 947)                  | 5.9 (3.3; 8.5)                 |
| M, age<75     | ITA     | 3,299           | 2,966           | 333 (228; 437)                  | 11.2 (7.7; 14.7)               |
| F, age<75     | ITA     | 1,709           | 1,581           | 128 (63; 192)                   | 8.1 (4.0; 12.1)                |
| M, age≥75     | ITA     | 8,482           | 7,168           | 1314 (1098; 1529)               | 18.3 (15.3; 21.3)              |
| F, age≥75     | ITA     | 12,023          | 9,911           | 2112 (1834; 2389)               | 21.3 (18.5; 24.1)              |
| M, age<75     | NET     | 579             | 530             | 49 (14; 83)                     | 9.2 (2.6; 15.7)                |
| F, age<75     | NET     | 267             | 256             | 11 (-5; 27)                     | 4.3 (-2.0; 10.5)               |
| M, age≥75     | NET     | 869             | 830             | 39 (-10; 88)                    | 4.7 (-1.2; 10.6)               |
| F, age≥75     | NET     | 1,084           | 1,073           | 11 (-41; 63)                    | 1.0 (-3.8; 5.9)                |
| M, age<75     | POL     | 3,142           | 2,596           | 546 (373; 718)                  | 21.0 (14.4; 27.7)              |
| F, age<75     | POL     | 1,773           | 1,594           | 179 (109; 248)                  | 11.2 (6.8; 15.6)               |
| M, age≥75     | POL     | 2,420           | 1,811           | 609 (481; 736)                  | 33.6 (26.6; 40.6)              |
| F, age≥75     | POL     | 4,825           | 3,637           | 1188 (1053; 1322)               | 32.7 (29.0; 36.3)              |
| M, age<75     | SPA     | 1,280           | 1,120           | 160 (115; 204)                  | 14.3 (10.3; 18.2)              |
| F, age<75     | SPA     | 546             | 507             | 39 (13; 64)                     | 7.7 (2.6; 12.6)                |
| M, age≥75     | SPA     | 3,804           | 3,175           | 629 (523; 734)                  | 19.8 (16.5; 23.1)              |
| F, age≥75     | SPA     | 5,667           | 4,637           | 1030 (888; 1171)                | 22.2 (19.2; 25.3)              |
| M, age<75     | UK      | 1,713           | 1,521           | 192 (85; 298)                   | 12.6 (5.6; 19.6)               |
| F, age<75     | UK      | 986             | 915             | 71 (16; 125)                    | 7.8 (1.7; 13.7)                |
| M, age≥75     | UK      | 2,892           | 2,763           | 129 (-45; 303)                  | 4.7 (-1.6; 11.0)               |
| F, age≥75     | UK      | 3,311           | 2,999           | 312 (170; 453)                  | 10.4 (5.7; 15.1)               |
| M, age<75     | ARG     | 3,194           | 3,152           | 42 (-163; 247)                  | 1.3 (-5.2; 7.8)                |
| F, age<75     | ARG     | 2,169           | 2,073           | 96 (-23; 215)                   | 4.6 (-1.1; 10.4)               |
| M, age≥75     | ARG     | 2,059           | 2,023           | 36 (-107; 179)                  | 1.8 (-5.3; 8.8)                |
| F, age≥75     | ARG     | 2,378           | 2,333           | 45 (-87; 177)                   | 1.9 (-3.7; 7.6)                |
| M, age<75     | BRA     | 22,139          | 19,144          | 2995 (1664; 4325)               | 15.6 (8.7; 22.6)               |
| F, age<75     | BRA     | 19,779          | 17,300          | 2479 (1573; 3384)               | 14.3 (9.1; 19.6)               |
| M, age≥75     | BRA     | 13,584          | 12,115          | 1469 (554; 2383)                | 12.1 (4.6; 19.7)               |
| F, age≥75     | BRA     | 20,202          | 18,520          | 1682 (724; 2639)                | 9.1 (3.9; 14.2)                |
| M, age<75     | CHI     | 923             | 962             | -39 (-131; 53)                  | -4.1 (-13.6; 5.5)              |
| F, age<75     | CHI     | 631             | 772             | -141 (-216; -65)                | -18.3 (-28.0; -8.4)            |
| M, age≥75     | CHI     | 926             | 939             | -13 (-103; 77)                  | -1.4 (-11.0; 8.2)              |
| F, age≥75     | CHI     | 1,185           | 1,254           | -69 (-182; 44)                  | -5.5 (-14.5; 3.5)              |
| M, age<75     | CUB     | 742             | 611             | 131 (85; 176)                   | 21.4 (13.9; 28.8)              |
| F, age<75     | CUB     | 827             | 674             | 153 (112; 193)                  | 22.7 (16.6; 28.6)              |
| M, age≥75     | CUB     | 498             | 441             | 57 (21; 92)                     | 12.9 (4.8; 20.9)               |
| F, age≥75     | CUB     | 820             | 703             | 117 (74; 159)                   | 16.6 (10.5; 22.6)              |
| M, age<75     | GUA     | 3,427           | 2,107           | 1320 (986; 1653)                | 62.6 (46.8; 78.5)              |
| F, age<75     | GUA     | 3,962           | 3,028           | 934 (607; 1260)                 | 30.8 (20.0; 41.6)              |
| M, age≥75     | GUA     | 1,090           | 764             | 326 (178; 473)                  | 42.7 (23.3; 61.9)              |
| F, age≥75     | GUA     | 1,517           | 1,254           | 263 (102; 423)                  | 21.0 (8.1; 33.7)               |
| M, age<75     | MEX     | 55,212          | 38,098          | 17,114 (13,566; 20,661)         | 44.9 (35.6; 54.2)              |
| F, age<75     | MEX     | 43,733          | 34,494          | 9239 (6846; 11,631)             | 26.8 (19.8; 33.7)              |
| M, age≥75     | MEX     | 22,575          | 16,429          | 6146 (4341; 7950)               | 37.4 (26.4; 48.4)              |
| F, age≥75     | MEX     | 27,076          | 21,107          | 5969 (4362; 7575)               | 28.3 (20.7; 35.9)              |
| M, age<75     | USA     | 35,152          | 29,712          | 5440 (3353; 7526)               | 18.3 (11.3; 25.3)              |
| F, age<75     | USA     | 22,054          | 17,870          | 4184 (3047; 5320)               | 23.4 (17.1; 29.8)              |
| M, age≥75     | USA     | 22,380          | 20,925          | 1455 (-121; 3031)               | 7.0 (-0.6; 14.5)               |
| F, age≥75     | USA     | 22,601          | 20,277          | 2324 (1049; 3598)               | 11.5 (5.2; 17.7)               |
| M, age<75     | JAP     | 3,046           | 2,936           | 110 (-31; 251)                  | 3.7 (-1.1; 8.5)                |
| F, age<75     | JAP     | 989             | 958             | 31 (-8; 70)                     | 3.2 (-0.8; 7.3)                |

| <b>Sex/Age group</b> | <b>Country</b> | <b>Observed deaths</b> | <b>Expected deaths</b> | <b>Absolute difference<br/>(95% CI)</b> | <b>Percent difference<br/>(95% CI)</b> |
|----------------------|----------------|------------------------|------------------------|-----------------------------------------|----------------------------------------|
| M, age $\geq$ 75     | JAP            | 4,719                  | 4,509                  | 210 (8; 411)                            | 4.7 (0.2; 9.1)                         |
| F, age $\geq$ 75     | JAP            | 5,145                  | 4,996                  | 149 (-2; 300)                           | 3.0 (0.0; 6.0)                         |
| M, age<75            | KOR            | 2,026                  | 1,983                  | 43 (-75; 161)                           | 2.2 (-3.8; 8.1)                        |
| F, age<75            | KOR            | 797                    | 945                    | -148 (-205; -90)                        | -15.7 (-21.7; -9.5)                    |
| M, age $\geq$ 75     | KOR            | 2,294                  | 2,085                  | 209 (84; 333)                           | 10.0 (4.0; 16.0)                       |
| F, age $\geq$ 75     | KOR            | 3,338                  | 3,152                  | 186 (28; 343)                           | 5.9 (0.9; 10.9)                        |
| M, age<75            | AUS            | 1,141                  | 1,027                  | 114 (53; 174)                           | 11.1 (5.2; 16.9)                       |
| F, age<75            | AUS            | 565                    | 556                    | 9 (-24; 42)                             | 1.6 (-4.3; 7.6)                        |
| M, age $\geq$ 75     | AUS            | 1,729                  | 1,784                  | -55 (-151; 41)                          | -3.1 (-8.5; 2.3)                       |
| F, age $\geq$ 75     | AUS            | 1,713                  | 1,729                  | -16 (-101; 69)                          | -0.9 (-5.8; 4.0)                       |

**Table 14.** Absolute and percent differences in the number of deaths from influenza and pneumonia registered in 2020 relative to the expected deaths, by age group (<75 vs ≥75 years) in countries with population ≥10 million.

| Sex/Age group | Country | Observed deaths | Expected deaths | Absolute difference (95% CI) | Percent difference (95% CI) |
|---------------|---------|-----------------|-----------------|------------------------------|-----------------------------|
| M, age<75     | CZE     | 822             | 775             | 47 (2; 91)                   | 6.1 (0.3; 11.7)             |
| F, age<75     | CZE     | 354             | 390             | -36 (-61; -10)               | -9.2 (-15.6; -2.6)          |
| M, age≥75     | CZE     | 1,334           | 1,217           | 117 (52; 181)                | 9.6 (4.3; 14.9)             |
| F, age≥75     | CZE     | 1,421           | 1,526           | -105 (-179; -30)             | -6.9 (-11.7; -2.0)          |
| M, age<75     | GER     | 2,023           | 2,288           | -265 (-372; -157)            | -11.6 (-16.3; -6.9)         |
| F, age<75     | GER     | 954             | 1,159           | -205 (-271; -138)            | -17.7 (-23.4; -11.9)        |
| M, age≥75     | GER     | 7,318           | 8,977           | -1659 (-1984; -1333)         | -18.5 (-22.1; -14.8)        |
| F, age≥75     | GER     | 6,911           | 9,411           | -2500 (-2843; -2156)         | -26.6 (-30.2; -22.9)        |
| M, age<75     | ITA     | 1,306           | 1,078           | 228 (170; 285)               | 21.2 (15.8; 26.4)           |
| F, age<75     | ITA     | 600             | 595             | 5 (-33; 43)                  | 0.8 (-5.5; 7.2)             |
| M, age≥75     | ITA     | 6,649           | 6,653           | -4 (-239; 231)               | -0.1 (-3.6; 3.5)            |
| F, age≥75     | ITA     | 7,282           | 7,874           | -592 (-852; -331)            | -7.5 (-10.8; -4.2)          |
| M, age<75     | NET     | 282             | 268             | 14 (-12; 40)                 | 5.2 (-4.5; 14.9)            |
| F, age<75     | NET     | 154             | 202             | -48 (-73; -22)               | -23.8 (-36.1; -10.9)        |
| M, age≥75     | NET     | 1,184           | 1,346           | -162 (-261; -62)             | -12.0 (-19.4; -4.6)         |
| F, age≥75     | NET     | 1,401           | 1,775           | -374 (-510; -237)            | -21.1 (-28.7; -13.4)        |
| M, age<75     | POL     | 4,916           | 4,391           | 525 (298; 751)               | 12.0 (6.8; 17.1)            |
| F, age<75     | POL     | 2,173           | 1,955           | 218 (118; 317)               | 11.2 (6.0; 16.2)            |
| M, age≥75     | POL     | 6,011           | 5,973           | 38 (-249; 325)               | 0.6 (-4.2; 5.4)             |
| F, age≥75     | POL     | 6,813           | 7,225           | -412 (-687; -136)            | -5.7 (-9.5; -1.9)           |
| M, age<75     | SPA     | 1,021           | 1,101           | -80 (-139; -20)              | -7.3 (-12.6; -1.8)          |
| F, age<75     | SPA     | 489             | 509             | -20 (-56; 16)                | -3.9 (-11.0; 3.1)           |
| M, age≥75     | SPA     | 4,129           | 5,015           | -886 (-1083; -688)           | -17.7 (-21.6; -13.7)        |
| F, age≥75     | SPA     | 4,023           | 5,321           | -1298 (-1514; -1081)         | -24.4 (-28.5; -20.3)        |
| M, age<75     | UK      | 2,272           | 2,748           | -476 (-624; -327)            | -17.3 (-22.7; -11.9)        |
| F, age<75     | UK      | 1,530           | 1,902           | -372 (-476; -267)            | -19.6 (-25.0; -14.0)        |
| M, age≥75     | UK      | 8,196           | 11,842          | -3646 (-4126; -3165)         | -30.8 (-34.8; -26.7)        |
| F, age≥75     | UK      | 9,881           | 14,676          | -4795 (-5308; -4281)         | -32.7 (-36.2; -29.2)        |
| M, age<75     | ARG     | 5,614           | 6,535           | -921 (-1331; -510)           | -14.1 (-20.4; -7.8)         |
| F, age<75     | ARG     | 3,513           | 4,286           | -773 (-1060; -485)           | -18.0 (-24.7; -11.3)        |
| M, age≥75     | ARG     | 7,928           | 10,996          | -3068 (-3692; -2443)         | -27.9 (-33.6; -22.2)        |
| F, age≥75     | ARG     | 9,913           | 15,778          | -5865 (-6666; -5063)         | -37.2 (-42.2; -32.1)        |
| M, age<75     | BRA     | 16,379          | 19,617          | -3238 (-5093; -1382)         | -16.5 (-26.0; -7.0)         |
| F, age<75     | BRA     | 10,839          | 13,236          | -2397 (-3800; -993)          | -18.1 (-28.7; -7.5)         |
| M, age≥75     | BRA     | 18,558          | 24,559          | -6001 (-8221; -3780)         | -24.4 (-33.5; -15.4)        |
| F, age≥75     | BRA     | 22,418          | 33,202          | -10,784 (-13,727; -7840)     | -32.5 (-41.3; -23.6)        |
| M, age<75     | CHI     | 539             | 706             | -167 (-240; -93)             | -23.7 (-34.0; -13.2)        |
| F, age<75     | CHI     | 276             | 331             | -55 (-96; -13)               | -16.6 (-29.0; -3.9)         |
| M, age≥75     | CHI     | 1,101           | 1,657           | -556 (-701; -410)            | -33.6 (-42.3; -24.7)        |
| F, age≥75     | CHI     | 1,293           | 2,013           | -720 (-889; -550)            | -35.8 (-44.2; -27.3)        |
| M, age<75     | CUB     | 1,207           | 1,397           | -190 (-285; -94)             | -13.6 (-20.4; -6.7)         |
| F, age<75     | CUB     | 769             | 964             | -195 (-264; -125)            | -20.2 (-27.4; -13.0)        |
| M, age≥75     | CUB     | 2,378           | 3,387           | -1009 (-1203; -814)          | -29.8 (-35.5; -24.0)        |
| F, age≥75     | CUB     | 2,292           | 3,332           | -1040 (-1227; -852)          | -31.2 (-36.8; -25.6)        |
| M, age<75     | GUA     | 1,524           | 2,036           | -512 (-1349; 325)            | -25.1 (-66.3; 16.0)         |
| F, age<75     | GUA     | 945             | 1,730           | -785 (-1521; -48)            | -45.4 (-87.9; -2.8)         |
| M, age≥75     | GUA     | 880             | 1,443           | -563 (-1175; 49)             | -39.0 (-81.4; 3.4)          |
| F, age≥75     | GUA     | 719             | 1,432           | -713 (-1320; -105)           | -49.8 (-92.2; -7.3)         |
| M, age<75     | MEX     | 25,029          | 9,177           | 15,852 (14,409; 17,294)      | 172.7 (157.0; 188.4)        |
| F, age<75     | MEX     | 13,962          | 6,144           | 7818 (6661; 8974)            | 127.2 (108.4; 146.1)        |
| M, age≥75     | MEX     | 10,159          | 7,955           | 2204 (927; 3480)             | 27.7 (11.7; 43.7)           |
| F, age≥75     | MEX     | 8,127           | 7,930           | 197 (-1202; 1596)            | 2.5 (-15.2; 20.1)           |
| M, age<75     | USA     | 12,264          | 9,544           | 2720 (2151; 3288)            | 28.5 (22.5; 34.5)           |
| F, age<75     | USA     | 9,227           | 7,512           | 1715 (1274; 2155)            | 22.8 (17.0; 28.7)           |
| M, age≥75     | USA     | 15,480          | 17,048          | -1568 (-2490; -645)          | -9.2 (-14.6; -3.8)          |
| F, age≥75     | USA     | 16,571          | 20,220          | -3649 (-4644; -2653)         | -18.0 (-23.0; -13.1)        |
| M, age<75     | JAP     | 6,318           | 6,804           | -486 (-741; -230)            | -7.1 (-10.9; -3.4)          |
| F, age<75     | JAP     | 1,829           | 2,187           | -358 (-468; -247)            | -16.4 (-21.4; -11.3)        |
| M, age≥75     | JAP     | 39,097          | 45,574          | -6477 (-7668; -5285)         | -14.2 (-16.8; -11.6)        |

| <b>Sex/Age group</b> | <b>Country</b> | <b>Observed deaths</b> | <b>Expected deaths</b> | <b>Absolute difference (95% CI)</b> | <b>Percent difference (95% CI)</b> |
|----------------------|----------------|------------------------|------------------------|-------------------------------------|------------------------------------|
| F, age $\geq$ 75     | JAP            | 32,157                 | 40,102                 | -7945 (-8968; -6921)                | -19.8 (-22.4; -17.3)               |
| M, age<75            | KOR            | 2,783                  | 3,408                  | -625 (-749; -500)                   | -18.3 (-22.0; -14.7)               |
| F, age<75            | KOR            | 889                    | 1,149                  | -260 (-318; -201)                   | -22.6 (-27.7; -17.5)               |
| M, age $\geq$ 75     | KOR            | 9,429                  | 11,729                 | -2300 (-2628; -1971)                | -19.6 (-22.4; -16.8)               |
| F, age $\geq$ 75     | KOR            | 9,408                  | 12,395                 | -2987 (-3335; -2638)                | -24.1 (-26.9; -21.3)               |
| M, age<75            | AUS            | 175                    | 364                    | -189 (-221; -156)                   | -51.9 (-60.7; -42.9)               |
| F, age<75            | AUS            | 121                    | 267                    | -146 (-170; -121)                   | -54.7 (-63.7; -45.3)               |
| M, age $\geq$ 75     | AUS            | 918                    | 1,529                  | -611 (-711; -510)                   | -40.0 (-46.5; -33.4)               |
| F, age $\geq$ 75     | AUS            | 1,073                  | 2,088                  | -1015 (-1130; -899)                 | -48.6 (-54.1; -43.1)               |



**Table 15.** Absolute and percent differences in the number of deaths from dementia and Alzheimer disease registered in 2020 relative to the expected deaths, by age group (<75 vs ≥75 years) in countries with population ≥10 million.

| Sex/Age group | Country | Observed deaths | Expected deaths | Absolute difference (95% CI) | Percent difference (95% CI) |
|---------------|---------|-----------------|-----------------|------------------------------|-----------------------------|
| M, age<75     | CZE     | 282             | 292             | -10 (-47; 27)                | -3.4 (-16.1; 9.2)           |
| F, age<75     | CZE     | 269             | 287             | -18 (-49; 13)                | -6.3 (-17.1; 4.5)           |
| M, age≥75     | CZE     | 1,236           | 1,224           | 12 (-102; 126)               | 1.0 (-8.3; 10.3)            |
| F, age≥75     | CZE     | 2,566           | 2,478           | 88 (-67; 243)                | 3.6 (-2.7; 9.8)             |
| M, age<75     | GER     | 1,466           | 1,829           | -363 (-520; -205)            | -19.8 (-28.4; -11.2)        |
| F, age<75     | GER     | 1,443           | 1,714           | -271 (-414; -127)            | -15.8 (-24.2; -7.4)         |
| M, age≥75     | GER     | 18,957          | 21,914          | -2957 (-3961; -1952)         | -13.5 (-18.1; -8.9)         |
| F, age≥75     | GER     | 38,827          | 45,099          | -6272 (-7724; -4819)         | -13.9 (-17.1; -10.7)        |
| M, age<75     | ITA     | 920             | 965             | -45 (-124; 34)               | -4.7 (-12.8; 3.5)           |
| F, age<75     | ITA     | 894             | 996             | -102 (-183; -20)             | -10.2 (-18.4; -2.0)         |
| M, age≥75     | ITA     | 10,863          | 11,230          | -367 (-873; 139)             | -3.3 (-7.8; 1.2)            |
| F, age≥75     | ITA     | 24,718          | 24,827          | -109 (-921; 703)             | -0.4 (-3.7; 2.8)            |
| M, age<75     | NET     | 401             | 501             | -100 (-147; -52)             | -20.0 (-29.3; -10.4)        |
| F, age<75     | NET     | 467             | 511             | -44 (-100; 12)               | -8.6 (-19.6; 2.3)           |
| M, age≥75     | NET     | 4,435           | 5,692           | -1257 (-1541; -972)          | -22.1 (-27.1; -17.1)        |
| F, age≥75     | NET     | 8,976           | 10,826          | -1850 (-2335; -1364)         | -17.1 (-21.6; -12.6)        |
| M, age<75     | POL     | 224             | 214             | 10 (-18; 38)                 | 4.7 (-8.4; 17.8)            |
| F, age<75     | POL     | 308             | 334             | -26 (-66; 14)                | -7.8 (-19.8; 4.2)           |
| M, age≥75     | POL     | 760             | 684             | 76 (4; 147)                  | 11.1 (0.6; 21.5)            |
| F, age≥75     | POL     | 2,237           | 1,804           | 433 (285; 580)               | 24.0 (15.8; 32.2)           |
| M, age<75     | SPA     | 862             | 934             | -72 (-153; 9)                | -7.7 (-16.4; 1.0)           |
| F, age<75     | SPA     | 865             | 829             | 36 (-36; 108)                | 4.3 (-4.3; 13.0)            |
| M, age≥75     | SPA     | 10,275          | 11,458          | -1183 (-1715; -650)          | -10.3 (-15.0; -5.7)         |
| F, age≥75     | SPA     | 24,391          | 25,725          | -1334 (-2153; -514)          | -5.2 (-8.4; -2.0)           |
| M, age<75     | UK      | 1,858           | 2,182           | -324 (-533; -114)            | -14.8 (-24.4; -5.2)         |
| F, age<75     | UK      | 2,100           | 2,297           | -197 (-433; 39)              | -8.6 (-18.9; 1.7)           |
| M, age≥75     | UK      | 25,106          | 29,338          | -4232 (-5642; -2821)         | -14.4 (-19.2; -9.6)         |
| F, age≥75     | UK      | 49,322          | 55,962          | -6640 (-8862; -4417)         | -11.9 (-15.8; -7.9)         |
| M, age<75     | ARG     | 124             | 159             | -35 (-57; -12)               | -22.0 (-35.8; -7.5)         |
| F, age<75     | ARG     | 154             | 186             | -32 (-52; -11)               | -17.2 (-28.0; -5.9)         |
| M, age≥75     | ARG     | 783             | 880             | -97 (-180; -13)              | -11.0 (-20.5; -1.5)         |
| F, age≥75     | ARG     | 2,030           | 2,251           | -221 (-355; -86)             | -9.8 (-15.8; -3.8)          |
| M, age<75     | BRA     | 1,373           | 1,420           | -47 (-235; 141)              | -3.3 (-16.5; 9.9)           |
| F, age<75     | BRA     | 1,469           | 1,461           | 8 (-149; 165)                | 0.5 (-10.2; 11.3)           |
| M, age≥75     | BRA     | 8,219           | 8,465           | -246 (-993; 501)             | -2.9 (-11.7; 5.9)           |
| F, age≥75     | BRA     | 15,676          | 16,454          | -778 (-1740; 184)            | -4.7 (-10.6; 1.1)           |
| M, age<75     | CHI     | 157             | 165             | -8 (-30; 14)                 | -4.8 (-18.2; 8.5)           |
| F, age<75     | CHI     | 162             | 155             | 7 (-12; 26)                  | 4.5 (-7.7; 16.8)            |
| M, age≥75     | CHI     | 1,315           | 1,141           | 174 (71; 276)                | 15.2 (6.2; 24.2)            |
| F, age≥75     | CHI     | 2,719           | 2,276           | 443 (299; 586)               | 19.5 (13.1; 25.7)           |
| M, age<75     | CUB     | 323             | 314             | 9 (-24; 42)                  | 2.9 (-7.6; 13.4)            |
| F, age<75     | CUB     | 306             | 317             | -11 (-46; 24)                | -3.5 (-14.5; 7.6)           |
| M, age≥75     | CUB     | 1,978           | 2,253           | -275 (-427; -122)            | -12.2 (-19.0; -5.4)         |
| F, age≥75     | CUB     | 2,829           | 3,038           | -209 (-404; -13)             | -6.9 (-13.3; -0.4)          |
| M, age<75     | GUA     | 9 <sup>a</sup>  | .               | .                            | .                           |
| F, age<75     | GUA     | 17              | 18              | -1 (-7; 5)                   | -5.6 (-38.9; 27.8)          |
| M, age≥75     | GUA     | 69              | 71              | -2 (-23; 19)                 | -2.8 (-32.4; 26.8)          |
| F, age≥75     | GUA     | 112             | 126             | -14 (-40; 12)                | -11.1 (-31.7; 9.5)          |
| M, age<75     | MEX     | 267             | 262             | 5 (-44; 54)                  | 1.9 (-16.8; 20.6)           |
| F, age<75     | MEX     | 303             | 316             | -13 (-62; 36)                | -4.1 (-19.6; 11.4)          |
| M, age≥75     | MEX     | 1,156           | 1,111           | 45 (-107; 197)               | 4.1 (-9.6; 17.7)            |
| F, age≥75     | MEX     | 1,967           | 1,902           | 65 (-129; 259)               | 3.4 (-6.8; 13.6)            |
| M, age<75     | USA     | 9,126           | 8,300           | 826 (-39; 1691)              | 10.0 (-0.5; 20.4)           |
| F, age<75     | USA     | 11,459          | 9,879           | 1580 (653; 2506)             | 16.0 (6.6; 25.4)            |
| M, age≥75     | USA     | 73,615          | 71,022          | 2593 (-1841; 7027)           | 3.7 (-2.6; 9.9)             |
| F, age≥75     | USA     | 165,313         | 155,279         | 10,034 (3145; 16,922)        | 6.5 (2.0; 10.9)             |
| M, age<75     | JAP     | 1,148           | 1,342           | -194 (-341; -46)             | -14.5 (-25.4; -3.4)         |
| F, age<75     | JAP     | 614             | 747             | -133 (-203; -62)             | -17.8 (-27.2; -8.3)         |
| M, age≥75     | JAP     | 13,749          | 16,870          | -3121 (-4042; -2199)         | -18.5 (-24.0; -13.0)        |

| Sex/Age group    | Country | Observed deaths | Expected deaths | Absolute difference (95% CI) | Percent difference (95% CI) |
|------------------|---------|-----------------|-----------------|------------------------------|-----------------------------|
| F, age $\geq$ 75 | JAP     | 26,167          | 31,430          | -5263 (-6163; -4362)         | -16.7 (-19.6; -13.9)        |
| M, age<75        | KOR     | 432             | 426             | 6 (-55; 67)                  | 1.4 (-12.9; 15.7)           |
| F, age<75        | KOR     | 216             | 262             | -46 (-75; -16)               | -17.6 (-28.6; -6.1)         |
| M, age $\geq$ 75 | KOR     | 2,896           | 2,819           | 77 (-195; 349)               | 2.7 (-6.9; 12.4)            |
| F, age $\geq$ 75 | KOR     | 7,096           | 7,342           | -246 (-586; 94)              | -3.4 (-8.0; 1.3)            |
| M, age<75        | AUS     | 371             | 468             | -97 (-141; -52)              | -20.7 (-30.1; -11.1)        |
| F, age<75        | AUS     | 416             | 460             | -44 (-91; 3)                 | -9.6 (-19.8; 0.7)           |
| M, age $\geq$ 75 | AUS     | 4,879           | 5,354           | -475 (-748; -201)            | -8.9 (-14.0; -3.8)          |
| F, age $\geq$ 75 | AUS     | 8,909           | 9,579           | -670 (-1073; -266)           | -7.0 (-11.2; -2.8)          |

<sup>a</sup> Expected deaths were not estimated when observed deaths were <10

**Table 16.** Absolute and percent differences in the number of deaths from transport accidents registered in 2020 relative to the expected deaths, by age group (<75 vs ≥75 years) in countries with population ≥10 million.

| Sex/Age group | Country | Observed deaths | Expected deaths | Absolute difference (95% CI) | Percent difference (95% CI) |
|---------------|---------|-----------------|-----------------|------------------------------|-----------------------------|
| M, age<75     | CZE     | 445             | 466             | -21 (-100; 58)               | -4.5 (-21.5; 12.4)          |
| F, age<75     | CZE     | 126             | 129             | -3 (-24; 18)                 | -2.3 (-18.6; 14.0)          |
| M, age≥75     | CZE     | 61              | 51              | 10 (-5; 25)                  | 19.6 (-9.8; 49.0)           |
| F, age≥75     | CZE     | 34              | 36              | -2 (-9; 5)                   | -5.6 (-25.0; 13.9)          |
| M, age<75     | GER     | 1,881           | 2,003           | -122 (-438; 194)             | -6.1 (-21.9; 9.7)           |
| F, age<75     | GER     | 497             | 553             | -56 (-128; 16)               | -10.1 (-23.1; 2.9)          |
| M, age≥75     | GER     | 492             | 490             | 2 (-102; 106)                | 0.4 (-20.8; 21.6)           |
| F, age≥75     | GER     | 248             | 266             | -18 (-57; 21)                | -6.8 (-21.4; 7.9)           |
| M, age<75     | ITA     | 1,658           | 2,060           | -402 (-712; -91)             | -19.5 (-34.6; -4.4)         |
| F, age<75     | ITA     | 351             | 492             | -141 (-209; -72)             | -28.7 (-42.5; -14.6)        |
| M, age≥75     | ITA     | 445             | 553             | -108 (-216; 0)               | -19.5 (-39.1; 0.0)          |
| F, age≥75     | ITA     | 164             | 215             | -51 (-85; -16)               | -23.7 (-39.5; -7.4)         |
| M, age<75     | NET     | 353             | 342             | 11 (-40; 62)                 | 3.2 (-11.7; 18.1)           |
| F, age<75     | NET     | 110             | 120             | -10 (-27; 7)                 | -8.3 (-22.5; 5.8)           |
| M, age≥75     | NET     | 138             | 160             | -22 (-50; 6)                 | -13.8 (-31.2; 3.8)          |
| F, age≥75     | NET     | 68              | 72              | -4 (-15; 7)                  | -5.6 (-20.8; 9.7)           |
| M, age<75     | POL     | 2,651           | 2,332           | 319 (-50; 688)               | 13.7 (-2.1; 29.5)           |
| F, age<75     | POL     | 563             | 627             | -64 (-140; 12)               | -10.2 (-22.3; 1.9)          |
| M, age≥75     | POL     | 207             | 192             | 15 (-42; 72)                 | 7.8 (-21.9; 37.5)           |
| F, age≥75     | POL     | 222             | 171             | 51 (24; 77)                  | 29.8 (14.0; 45.0)           |
| M, age<75     | SPA     | 1,188           | 1,344           | -156 (-347; 35)              | -11.6 (-25.8; 2.6)          |
| F, age<75     | SPA     | 241             | 318             | -77 (-117; -36)              | -24.2 (-36.8; -11.3)        |
| M, age≥75     | SPA     | 214             | 270             | -56 (-110; -1)               | -20.7 (-40.7; -0.4)         |
| F, age≥75     | SPA     | 83              | 124             | -41 (-59; -22)               | -33.1 (-47.6; -17.7)        |
| M, age<75     | UK      | 926             | 1,147           | -221 (-423; -18)             | -19.3 (-36.9; -1.6)         |
| F, age<75     | UK      | 223             | 338             | -115 (-163; -66)             | -34.0 (-48.2; -19.5)        |
| M, age≥75     | UK      | 165             | 194             | -29 (-80; 22)                | -14.9 (-41.2; 11.3)         |
| F, age≥75     | UK      | 109             | 140             | -31 (-54; -7)                | -22.1 (-38.6; -5.0)         |
| M, age<75     | ARG     | 1,845           | 2,874           | -1029 (-1623; -434)          | -35.8 (-56.5; -15.1)        |
| F, age<75     | ARG     | 387             | 761             | -374 (-474; -273)            | -49.1 (-62.3; -35.9)        |
| M, age≥75     | ARG     | 89              | 133             | -44 (-113; 25)               | -33.1 (-85.0; 18.8)         |
| F, age≥75     | ARG     | 28              | 71              | -43 (-59; -26)               | -60.6 (-83.1; -36.6)        |
| M, age<75     | BRA     | 27,277          | 25,117          | 2160 (-2609; 6929)           | 8.6 (-10.4; 27.6)           |
| F, age<75     | BRA     | 4,994           | 4,937           | 57 (-520; 634)               | 1.2 (-10.5; 12.8)           |
| M, age≥75     | BRA     | 1,033           | 1,217           | -184 (-775; 407)             | -15.1 (-63.7; 33.4)         |
| F, age≥75     | BRA     | 353             | 532             | -179 (-286; -71)             | -33.6 (-53.8; -13.3)        |
| M, age<75     | CHI     | 1,330           | 1,360           | -30 (-243; 183)              | -2.2 (-17.9; 13.5)          |
| F, age<75     | CHI     | 317             | 346             | -29 (-65; 7)                 | -8.4 (-18.8; 2.0)           |
| M, age≥75     | CHI     | 69              | 112             | -43 (-77; -8)                | -38.4 (-68.8; -7.1)         |
| F, age≥75     | CHI     | 33              | 53              | -20 (-28; -11)               | -37.7 (-52.8; -20.8)        |
| M, age<75     | CUB     | 495             | 683             | -188 (-288; -87)             | -27.5 (-42.2; -12.7)        |
| F, age<75     | CUB     | 108             | 170             | -62 (-86; -37)               | -36.5 (-50.6; -21.8)        |
| M, age≥75     | CUB     | 56              | 97              | -41 (-64; -17)               | -42.3 (-66.0; -17.5)        |
| F, age≥75     | CUB     | 17              | 32              | -15 (-22; -7)                | -46.9 (-68.8; -21.9)        |
| M, age<75     | GUA     | 1,096           | 1,526           | -430 (-779; -80)             | -28.2 (-51.0; -5.2)         |
| F, age<75     | GUA     | 202             | 293             | -91 (-132; -49)              | -31.1 (-45.1; -16.7)        |
| M, age≥75     | GUA     | 33              | 67              | -34 (-80; 12)                | -50.7 (-119.4; 17.9)        |
| F, age≥75     | GUA     | 14              | 21              | -7 (-13; 0)                  | -33.3 (-61.9; 0.0)          |
| M, age<75     | MEX     | 10,670          | 11,435          | -765 (-2953; 1423)           | -6.7 (-25.8; 12.4)          |
| F, age<75     | MEX     | 2,257           | 2,664           | -407 (-672; -141)            | -15.3 (-25.2; -5.3)         |
| M, age≥75     | MEX     | 481             | 620             | -139 (-423; 145)             | -22.4 (-68.2; 23.4)         |
| F, age≥75     | MEX     | 153             | 265             | -112 (-158; -65)             | -42.3 (-59.6; -24.5)        |
| M, age<75     | USA     | 30,270          | 28,383          | 1887 (-2612; 6386)           | 6.6 (-9.2; 22.5)            |
| F, age<75     | USA     | 10,826          | 10,488          | 338 (-963; 1639)             | 3.2 (-9.2; 15.6)            |
| M, age≥75     | USA     | 2,648           | 2,991           | -343 (-1205; 519)            | -11.5 (-40.3; 17.4)         |
| F, age≥75     | USA     | 1,415           | 1,863           | -448 (-792; -103)            | -24.0 (-42.5; -5.5)         |
| M, age<75     | JAP     | 1,782           | 1,963           | -181 (-390; 28)              | -9.2 (-19.9; 1.4)           |
| F, age<75     | JAP     | 490             | 607             | -117 (-161; -72)             | -19.3 (-26.5; -11.9)        |
| M, age≥75     | JAP     | 866             | 982             | -116 (-233; 1)               | -11.8 (-23.7; 0.1)          |

| <b>Sex/Age group</b> | <b>Country</b> | <b>Observed deaths</b> | <b>Expected deaths</b> | <b>Absolute difference (95% CI)</b> | <b>Percent difference (95% CI)</b> |
|----------------------|----------------|------------------------|------------------------|-------------------------------------|------------------------------------|
| F, age $\geq$ 75     | JAP            | 683                    | 710                    | -27 (-78; 24)                       | -3.8 (-11.0; 3.4)                  |
| M, age<75            | KOR            | 2,291                  | 2,428                  | -137 (-369; 95)                     | -5.6 (-15.2; 3.9)                  |
| F, age<75            | KOR            | 592                    | 713                    | -121 (-175; -66)                    | -17.0 (-24.5; -9.3)                |
| M, age $\geq$ 75     | KOR            | 698                    | 689                    | 9 (-76; 94)                         | 1.3 (-11.0; 13.6)                  |
| F, age $\geq$ 75     | KOR            | 406                    | 402                    | 4 (-29; 37)                         | 1.0 (-7.2; 9.2)                    |
| M, age<75            | AUS            | 897                    | 937                    | -40 (-184; 104)                     | -4.3 (-19.6; 11.1)                 |
| F, age<75            | AUS            | 265                    | 268                    | -3 (-40; 34)                        | -1.1 (-14.9; 12.7)                 |
| M, age $\geq$ 75     | AUS            | 136                    | 136                    | 0 (-33; 33)                         | 0.0 (-24.3; 24.3)                  |
| F, age $\geq$ 75     | AUS            | 57                     | 70                     | -13 (-25; 0)                        | -18.6 (-35.7; 0.0)                 |

**Table 17.** Absolute and percent differences in the number of deaths from suicides registered in 2020 relative to the expected deaths, by age group (<75 vs ≥75 years) in countries with population ≥10 million.

| Sex/Age group | Country | Observed deaths | Expected deaths | Absolute difference (95% CI) | Percent difference (95% CI) |
|---------------|---------|-----------------|-----------------|------------------------------|-----------------------------|
| M, age<75     | CZE     | 839             | 829             | 10 (-119; 139)               | 1.2 (-14.4; 16.8)           |
| F, age<75     | CZE     | 180             | 212             | -32 (-64; 0)                 | -15.1 (-30.2; 0.0)          |
| M, age≥75     | CZE     | 170             | 122             | 48 (18; 77)                  | 39.3 (14.8; 63.1)           |
| F, age≥75     | CZE     | 35              | 43              | -8 (-17; 1)                  | -18.6 (-39.5; 2.3)          |
| M, age<75     | GER     | 5,133           | 5,168           | -35 (-662; 592)              | -0.7 (-12.8; 11.5)          |
| F, age<75     | GER     | 1,627           | 1,644           | -17 (-187; 153)              | -1.0 (-11.4; 9.3)           |
| M, age≥75     | GER     | 1,819           | 1,745           | 74 (-187; 335)               | 4.2 (-10.7; 19.2)           |
| F, age≥75     | GER     | 642             | 580             | 62 (-11; 135)                | 10.7 (-1.9; 23.3)           |
| M, age<75     | ITA     | 2,160           | 2,182           | -22 (-310; 266)              | -1.0 (-14.2; 12.2)          |
| F, age<75     | ITA     | 615             | 656             | -41 (-120; 38)               | -6.2 (-18.3; 5.8)           |
| M, age≥75     | ITA     | 682             | 617             | 65 (-39; 169)                | 10.5 (-6.3; 27.4)           |
| F, age≥75     | ITA     | 161             | 161             | 0 (-26; 26)                  | 0.0 (-16.1; 16.1)           |
| M, age<75     | NET     | 1,091           | 1,136           | -45 (-218; 128)              | -4.0 (-19.2; 11.3)          |
| F, age<75     | NET     | 518             | 570             | -52 (-132; 28)               | -9.1 (-23.2; 4.9)           |
| M, age≥75     | NET     | 137             | 135             | 2 (-34; 38)                  | 1.5 (-25.2; 28.1)           |
| F, age≥75     | NET     | 78              | 71              | 7 (-9; 23)                   | 9.9 (-12.7; 32.4)           |
| M, age<75     | POL     | 3,685           | 3,329           | 356 (-163; 875)              | 10.7 (-4.9; 26.3)           |
| F, age<75     | POL     | 542             | 485             | 57 (-7; 121)                 | 11.8 (-1.4; 24.9)           |
| M, age≥75     | POL     | 273             | 215             | 58 (-10; 126)                | 27.0 (-4.7; 58.6)           |
| F, age≥75     | POL     | 59              | 63              | -4 (-17; 9)                  | -6.3 (-27.0; 14.3)          |
| M, age<75     | SPA     | 2,341           | 2,180           | 161 (-134; 456)              | 7.4 (-6.1; 20.9)            |
| F, age<75     | SPA     | 834             | 807             | 27 (-76; 130)                | 3.3 (-9.4; 16.1)            |
| M, age≥75     | SPA     | 590             | 569             | 21 (-80; 122)                | 3.7 (-14.1; 21.4)           |
| F, age≥75     | SPA     | 182             | 172             | 10 (-21; 41)                 | 5.8 (-12.2; 23.8)           |
| M, age<75     | UK      | 3,918           | 3,860           | 58 (-618; 734)               | 1.5 (-16.0; 19.0)           |
| F, age<75     | UK      | 1,235           | 1,214           | 21 (-172; 214)               | 1.7 (-14.2; 17.6)           |
| M, age≥75     | UK      | 270             | 311             | -41 (-152; 70)               | -13.2 (-48.9; 22.5)         |
| F, age≥75     | UK      | 104             | 114             | -10 (-44; 24)                | -8.8 (-38.6; 21.1)          |
| M, age<75     | ARG     | 2,123           | 2,445           | -322 (-864; 220)             | -13.2 (-35.3; 9.0)          |
| F, age<75     | ARG     | 477             | 569             | -92 (-215; 31)               | -16.2 (-37.8; 5.4)          |
| M, age≥75     | ARG     | 183             | 219             | -36 (-130; 58)               | -16.4 (-59.4; 26.5)         |
| F, age≥75     | ARG     | 20              | 28              | -8 (-23; 7)                  | -28.6 (-82.1; 25.0)         |
| M, age<75     | BRA     | 10,282          | 10,229          | 53 (-1831; 1937)             | 0.5 (-17.9; 18.9)           |
| F, age<75     | BRA     | 2,847           | 2,828           | 19 (-428; 466)               | 0.7 (-15.1; 16.5)           |
| M, age≥75     | BRA     | 569             | 594             | -25 (-297; 247)              | -4.2 (-50.0; 41.6)          |
| F, age≥75     | BRA     | 118             | 117             | 1 (-52; 54)                  | 0.9 (-44.4; 46.2)           |
| M, age<75     | CHI     | 1,232           | 1,400           | -168 (-431; 95)              | -12.0 (-30.8; 6.8)          |
| F, age<75     | CHI     | 269             | 313             | -44 (-100; 12)               | -14.1 (-31.9; 3.8)          |
| M, age≥75     | CHI     | 90              | 108             | -18 (-60; 24)                | -16.7 (-55.6; 22.2)         |
| F, age≥75     | CHI     | 11              | 12              | -1 (-7; 5)                   | -8.3 (-58.3; 41.7)          |
| M, age<75     | CUB     | 965             | 918             | 47 (-76; 170)                | 5.1 (-8.3; 18.5)            |
| F, age<75     | CUB     | 220             | 235             | -15 (-47; 17)                | -6.4 (-20.0; 7.2)           |
| M, age≥75     | CUB     | 317             | 263             | 54 (7; 100)                  | 20.5 (2.7; 38.0)            |
| F, age≥75     | CUB     | 54              | 54              | 0 (-10; 10)                  | 0.0 (-18.5; 18.5)           |
| M, age<75     | GUA     | 396             | 499             | -103 (-233; 27)              | -20.6 (-46.7; 5.4)          |
| F, age<75     | GUA     | 167             | 164             | 3 (-53; 59)                  | 1.8 (-32.3; 36.0)           |
| M, age≥75     | GUA     | 9 <sup>a</sup>  | .               | .                            | .                           |
| F, age≥75     | GUA     | 2 <sup>a</sup>  | .               | .                            | .                           |
| M, age<75     | MEX     | 6,141           | 5,609           | 532 (-702; 1766)             | 9.5 (-12.5; 31.5)           |
| F, age<75     | MEX     | 1,402           | 1,307           | 95 (-189; 379)               | 7.3 (-14.5; 29.0)           |
| M, age≥75     | MEX     | 183             | 204             | -21 (-166; 124)              | -10.3 (-81.4; 60.8)         |
| F, age≥75     | MEX     | 13              | 13              | 0 (-28; 28)                  | 0.0 (-215.4; 215.4)         |
| M, age<75     | USA     | 32,650          | 34,876          | -2226 (-7903; 3451)          | -6.4 (-22.7; 9.9)           |
| F, age<75     | USA     | 8,906           | 10,462          | -1556 (-3084; -27)           | -14.9 (-29.5; -0.3)         |
| M, age≥75     | USA     | 3,900           | 4,017           | -117 (-1275; 1041)           | -2.9 (-31.7; 25.9)          |
| F, age≥75     | USA     | 521             | 604             | -83 (-290; 124)              | -13.7 (-48.0; 20.5)         |
| M, age<75     | JAP     | 11,407          | 10,485          | 922 (-618; 2462)             | 8.8 (-5.9; 23.5)            |
| F, age<75     | JAP     | 5,299           | 4,071           | 1228 (675; 1780)             | 30.2 (16.6; 43.7)           |
| M, age≥75     | JAP     | 2,151           | 1,967           | 184 (-231; 599)              | 9.4 (-11.7; 30.5)           |

| <b>Sex/Age group</b> | <b>Country</b> | <b>Observed deaths</b> | <b>Expected deaths</b> | <b>Absolute difference (95% CI)</b> | <b>Percent difference (95% CI)</b> |
|----------------------|----------------|------------------------|------------------------|-------------------------------------|------------------------------------|
| F, age $\geq$ 75     | JAP            | 1,355                  | 1,262                  | 93 (-120; 306)                      | 7.4 (-9.5; 24.2)                   |
| M, age<75            | KOR            | 7,832                  | 7,618                  | 214 (-880; 1308)                    | 2.8 (-11.6; 17.2)                  |
| F, age<75            | KOR            | 3,464                  | 2,721                  | 743 (308; 1177)                     | 27.3 (11.3; 43.3)                  |
| M, age $\geq$ 75     | KOR            | 1,261                  | 1,529                  | -268 (-593; 57)                     | -17.5 (-38.8; 3.7)                 |
| F, age $\geq$ 75     | KOR            | 639                    | 777                    | -138 (-299; 23)                     | -17.8 (-38.5; 3.0)                 |
| M, age<75            | AUS            | 2,187                  | 2,456                  | -269 (-690; 152)                    | -11.0 (-28.1; 6.2)                 |
| F, age<75            | AUS            | 692                    | 803                    | -111 (-238; 16)                     | -13.8 (-29.6; 2.0)                 |
| M, age $\geq$ 75     | AUS            | 197                    | 227                    | -30 (-106; 46)                      | -13.2 (-46.7; 20.3)                |
| F, age $\geq$ 75     | AUS            | 63                     | 71                     | -8 (-29; 13)                        | -11.3 (-40.8; 18.3)                |

<sup>a</sup> Expected deaths were not estimated when observed deaths were <10

**Table 18.** Absolute and percent differences in the number of deaths from ill-defined causes registered in 2020 relative to the expected deaths, by age group (<75 vs ≥75 years) in countries with population ≥10 million.

| Sex/Age group | Country | Observed deaths | Expected deaths | Absolute difference (95% CI) | Percent difference (95% CI) |
|---------------|---------|-----------------|-----------------|------------------------------|-----------------------------|
| M, age<75     | CZE     | 990             | 739             | 251 (180; 321)               | 34.0 (24.4; 43.4)           |
| F, age<75     | CZE     | 456             | 330             | 126 (98; 153)                | 38.2 (29.7; 46.4)           |
| M, age≥75     | CZE     | 852             | 338             | 514 (476; 551)               | 152.1 (140.8; 163.0)        |
| F, age≥75     | CZE     | 1,378           | 584             | 794 (751; 836)               | 136.0 (128.6; 143.2)        |
| M, age<75     | GER     | 12,559          | 13,621          | -1062 (-1887; -236)          | -7.8 (-13.9; -1.7)          |
| F, age<75     | GER     | 5,262           | 5,047           | 215 (-58; 488)               | 4.3 (-1.1; 9.7)             |
| M, age≥75     | GER     | 7,806           | 8,542           | -736 (-1299; -172)           | -8.6 (-15.2; -2.0)          |
| F, age≥75     | GER     | 9,518           | 10,283          | -765 (-1250; -279)           | -7.4 (-12.2; -2.7)          |
| M, age<75     | ITA     | 3,960           | 1,872           | 2088 (1933; 2242)            | 111.5 (103.3; 119.8)        |
| F, age<75     | ITA     | 1,572           | 762             | 810 (766; 853)               | 106.3 (100.5; 111.9)        |
| M, age≥75     | ITA     | 6,676           | 3,965           | 2711 (2427; 2994)            | 68.4 (61.2; 75.5)           |
| F, age≥75     | ITA     | 13,724          | 9,166           | 4558 (4278; 4837)            | 49.7 (46.7; 52.8)           |
| M, age<75     | NET     | 2,003           | 1,637           | 366 (258; 473)               | 22.4 (15.8; 28.9)           |
| F, age<75     | NET     | 988             | 811             | 177 (127; 226)               | 21.8 (15.7; 27.9)           |
| M, age≥75     | NET     | 2,413           | 1,849           | 564 (445; 682)               | 30.5 (24.1; 36.9)           |
| F, age≥75     | NET     | 3,590           | 3,025           | 565 (423; 706)               | 18.7 (14.0; 23.3)           |
| M, age<75     | POL     | 15,442          | 15,781          | -339 (-1884; 1206)           | -2.1 (-11.9; 7.6)           |
| F, age<75     | POL     | 5,104           | 4,656           | 448 (83; 812)                | 9.6 (1.8; 17.4)             |
| M, age≥75     | POL     | 9,751           | 8,789           | 962 (2; 1921)                | 10.9 (0.0; 21.9)            |
| F, age≥75     | POL     | 19,398          | 18,298          | 1100 (50; 2149)              | 6.0 (0.3; 11.7)             |
| M, age<75     | SPA     | 1,492           | 1,983           | -491 (-664; -317)            | -24.8 (-33.5; -16.0)        |
| F, age<75     | SPA     | 573             | 757             | -184 (-233; -134)            | -24.3 (-30.8; -17.7)        |
| M, age≥75     | SPA     | 2,686           | 2,341           | 345 (146; 543)               | 14.7 (6.2; 23.2)            |
| F, age≥75     | SPA     | 4,669           | 4,061           | 608 (419; 796)               | 15.0 (10.3; 19.6)           |
| M, age<75     | UK      | 905             | 1,107           | -202 (-304; -99)             | -18.2 (-27.5; -8.9)         |
| F, age<75     | UK      | 499             | 480             | 19 (-30; 68)                 | 4.0 (-6.2; 14.2)            |
| M, age≥75     | UK      | 4,407           | 3,540           | 867 (609; 1124)              | 24.5 (17.2; 31.8)           |
| F, age≥75     | UK      | 12,131          | 10,110          | 2021 (1579; 2462)            | 20.0 (15.6; 24.4)           |
| M, age<75     | ARG     | 6,249           | 5,321           | 928 (549; 1306)              | 17.4 (10.3; 24.5)           |
| F, age<75     | ARG     | 3,315           | 2,797           | 518 (328; 707)               | 18.5 (11.7; 25.3)           |
| M, age≥75     | ARG     | 5,561           | 4,825           | 736 (387; 1084)              | 15.3 (8.0; 22.5)            |
| F, age≥75     | ARG     | 8,190           | 6,995           | 1195 (788; 1601)             | 17.1 (11.3; 22.9)           |
| M, age<75     | BRA     | 34,870          | 25,631          | 9239 (6924; 11553)           | 36.0 (27.0; 45.1)           |
| F, age<75     | BRA     | 16,292          | 11,800          | 4492 (3687; 5296)            | 38.1 (31.2; 44.9)           |
| M, age≥75     | BRA     | 17,561          | 15,147          | 2414 (917; 3910)             | 15.9 (6.1; 25.8)            |
| F, age≥75     | BRA     | 20,906          | 18,100          | 2806 (1660; 3951)            | 15.5 (9.2; 21.8)            |
| M, age<75     | CHI     | 777             | 666             | 111 (36; 185)                | 16.7 (5.4; 27.8)            |
| F, age<75     | CHI     | 367             | 310             | 57 (19; 94)                  | 18.4 (6.1; 30.3)            |
| M, age≥75     | CHI     | 691             | 682             | 9 (-66; 84)                  | 1.3 (-9.7; 12.3)            |
| F, age≥75     | CHI     | 1,085           | 1,044           | 41 (-59; 141)                | 3.9 (-5.7; 13.5)            |
| M, age<75     | CUB     | 434             | 441             | -7 (-54; 40)                 | -1.6 (-12.2; 9.1)           |
| F, age<75     | CUB     | 183             | 170             | 13 (-7; 33)                  | 7.6 (-4.1; 19.4)            |
| M, age≥75     | CUB     | 230             | 226             | 4 (-23; 31)                  | 1.8 (-10.2; 13.7)           |
| F, age≥75     | CUB     | 244             | 245             | -1 (-28; 26)                 | -0.4 (-11.4; 10.6)          |
| M, age<75     | GUA     | 3,763           | 3,572           | 191 (-322; 704)              | 5.3 (-9.0; 19.7)            |
| F, age<75     | GUA     | 2,767           | 2,890           | -123 (-523; 277)             | -4.3 (-18.1; 9.6)           |
| M, age≥75     | GUA     | 3,402           | 2,968           | 434 (-2; 870)                | 14.6 (-0.1; 29.3)           |
| F, age≥75     | GUA     | 3,267           | 3,307           | -40 (-478; 398)              | -1.2 (-14.5; 12.0)          |
| M, age<75     | MEX     | 1,564           | 1,301           | 263 (136; 389)               | 20.2 (10.5; 29.9)           |
| F, age<75     | MEX     | 933             | 857             | 76 (-14; 166)                | 8.9 (-1.6; 19.4)            |
| M, age≥75     | MEX     | 3,818           | 2,807           | 1011 (772; 1249)             | 36.0 (27.5; 44.5)           |
| F, age≥75     | MEX     | 3,874           | 3,219           | 655 (393; 916)               | 20.3 (12.2; 28.5)           |
| M, age<75     | USA     | 14,401          | 9,293           | 5108 (3690; 6525)            | 55.0 (39.7; 70.2)           |
| F, age<75     | USA     | 8,920           | 4,943           | 3977 (3198; 4755)            | 80.5 (64.7; 96.2)           |
| M, age≥75     | USA     | 9,983           | 8,455           | 1528 (220; 2835)             | 18.1 (2.6; 33.5)            |
| F, age≥75     | USA     | 15,407          | 12,132          | 3275 (1653; 4896)            | 27.0 (13.6; 40.4)           |
| M, age<75     | JAP     | 10,391          | 9,908           | 483 (4; 961)                 | 4.9 (0.0; 9.7)              |
| F, age<75     | JAP     | 3,011           | 2,979           | 32 (-153; 217)               | 1.1 (-5.1; 7.3)             |
| M, age≥75     | JAP     | 42,536          | 41,997          | 539 (-952; 2030)             | 1.3 (-2.3; 4.8)             |

| <b>Sex/Age group</b> | <b>Country</b> | <b>Observed deaths</b> | <b>Expected deaths</b> | <b>Absolute difference (95% CI)</b> | <b>Percent difference (95% CI)</b> |
|----------------------|----------------|------------------------|------------------------|-------------------------------------|------------------------------------|
| F, age $\geq$ 75     | JAP            | 103,867                | 106,663                | -2796 (-5084; -507)                 | -2.6 (-4.8; -0.5)                  |
| M, age<75            | KOR            | 5,983                  | 4,454                  | 1529 (1232; 1825)                   | 34.3 (27.7; 41.0)                  |
| F, age<75            | KOR            | 1,793                  | 1,298                  | 495 (407; 582)                      | 38.1 (31.4; 44.8)                  |
| M, age $\geq$ 75     | KOR            | 9,186                  | 7,637                  | 1549 (1085; 2012)                   | 20.3 (14.2; 26.3)                  |
| F, age $\geq$ 75     | KOR            | 16,921                 | 14,400                 | 2521 (1949; 3092)                   | 17.5 (13.5; 21.5)                  |
| M, age<75            | AUS            | 963                    | 412                    | 551 (484; 617)                      | 133.7 (117.5; 149.8)               |
| F, age<75            | AUS            | 458                    | 271                    | 187 (142; 231)                      | 69.0 (52.4; 85.2)                  |
| M, age $\geq$ 75     | AUS            | 594                    | 377                    | 217 (155; 278)                      | 57.6 (41.1; 73.7)                  |
| F, age $\geq$ 75     | AUS            | 973                    | 706                    | 267 (173; 360)                      | 37.8 (24.5; 51.0)                  |



**Figure 2.** Sensitivity analysis: comparison of the relative difference between observed and expected deaths (P-score) in 2019 vs 2020.

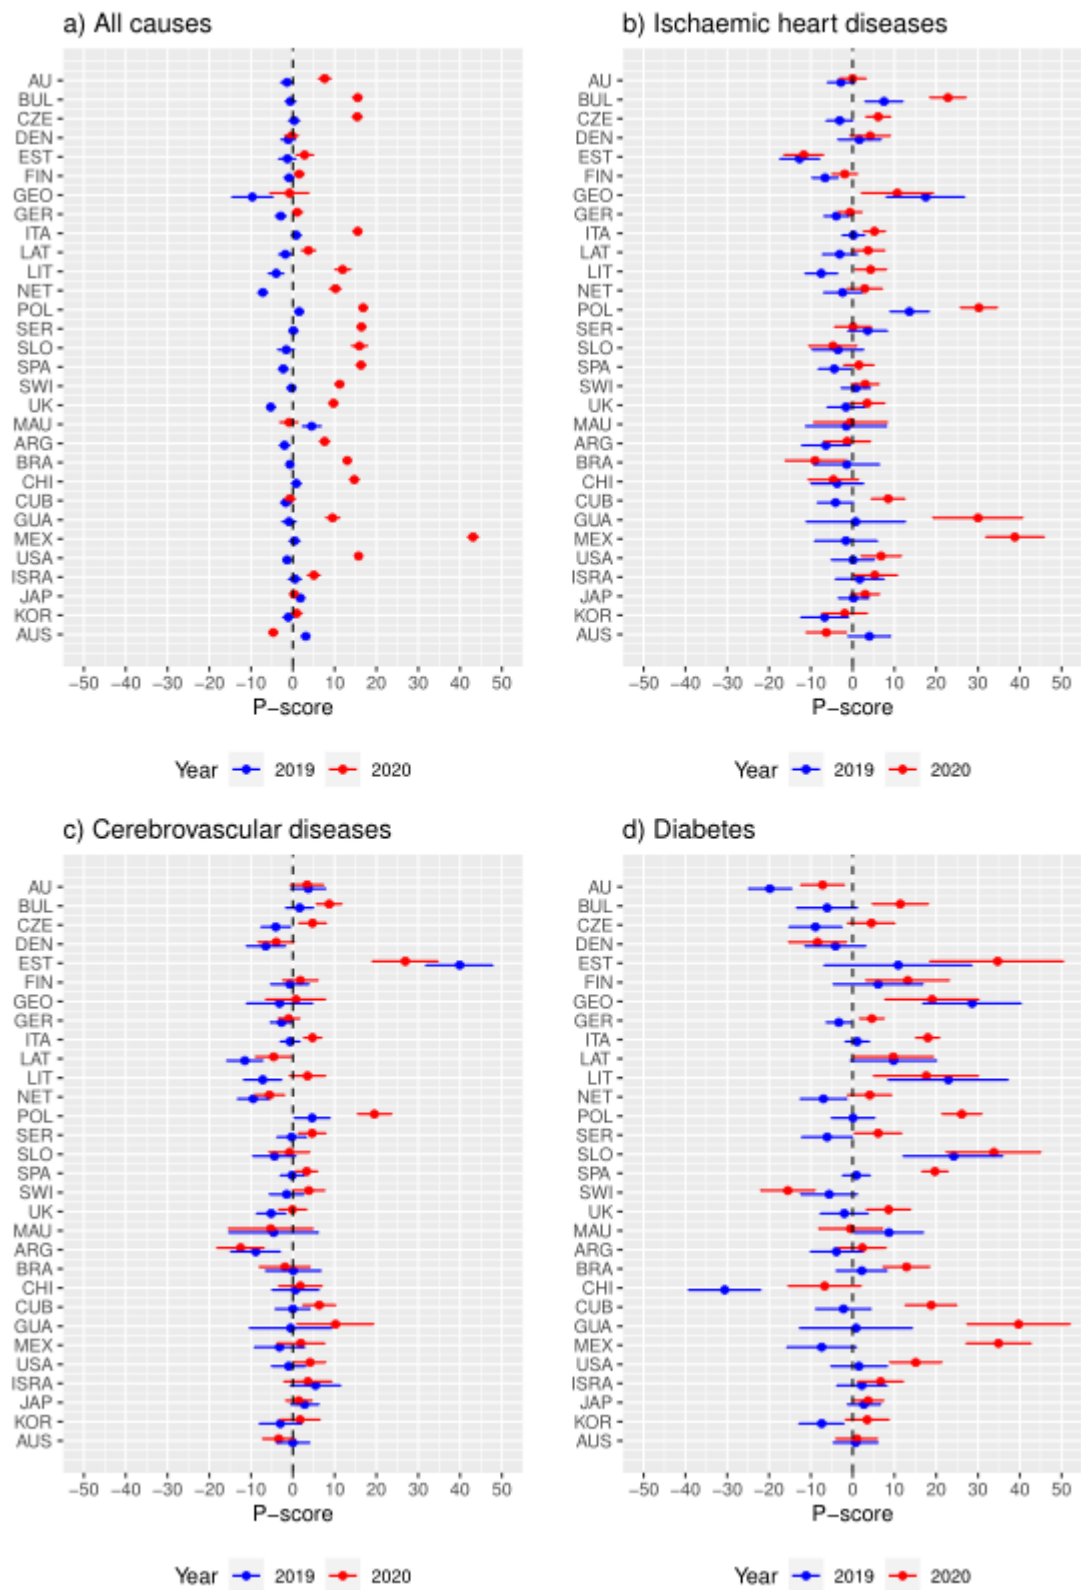

Supplement: MOESM1 [file 26020392]
